# Supplementary material
Source: Royal Society of Chemistry journal article supplement (doi:10.1039/d6gc02782b)

## Supplementary Information

# Photoinduced Iron-Catalyzed LMCT Enables Propargylic C(sp<sup>3</sup>)-H Activation to Access Polysubstituted $\alpha$ -Bromoenones

Haifei Jiang,<sup>a, #</sup> Zihua Ye,<sup>a, #</sup> Xiaohui Gao,<sup>a, #</sup> Yuhan Wang,<sup>a</sup> Xinyi He,<sup>a</sup>

Cong Lin,<sup>\*, a</sup> and Liang Shen<sup>\*, b</sup>

<sup>a</sup> College of Chemistry and Chemical Engineering, Jiangxi Science & Technology Normal University, Nanchang 330013, China. E-mail: conglin@jsxtnu.edu.cn

<sup>b</sup> Jiangxi Provincial Engineering Research Center for Waterborne Coatings, Jiangxi Science & Technology Normal University, Nanchang 330013, China.

<sup>#</sup> These authors contributed equally

### Table of Contents

|                                                                 |     |
|-----------------------------------------------------------------|-----|
| General Information .....                                       | S2  |
| Table S1 Optimization of Reaction Conditions <sup>a</sup> ..... | S3  |
| Analytical Data for Products .....                              | S6  |
| Large-scale synthesis of <b>2a</b> and <b>2w</b> .....          | S15 |
| Product diversification .....                                   | S16 |
| Preliminary Mechanistic Investigations .....                    | S18 |
| References .....                                                | S24 |
| Copies of <sup>1</sup> H and <sup>13</sup> C NMR Spectra .....  | S25 |

## General Information

All reactions were performed at 40 W blue LED (450-455 nm) irradiation (SSSTECH-LAL1CV1.0, Shanghai 3S Technology Co., Ltd) under air atmosphere in a 25 mL sealed tube. The materials, solvents and alkynes **1** were purchased from common commercial sources and used without additional purification, if there is no special version. <sup>1</sup>H NMR spectra were recorded at 400 MHz using TMS as internal standard, <sup>13</sup>C NMR spectra was recorded at 100 MHz using TMS as internal standard. The multiplicities are reported as follows: singlet (s), doublet (d), doublet of doublets (dd), multiplet (m), and and triplet (t). Mass spectroscopy data of the products were collected on an HRMS-TOF instrument.

**Table S1 Optimization of Reaction Conditions<sup>a</sup>**

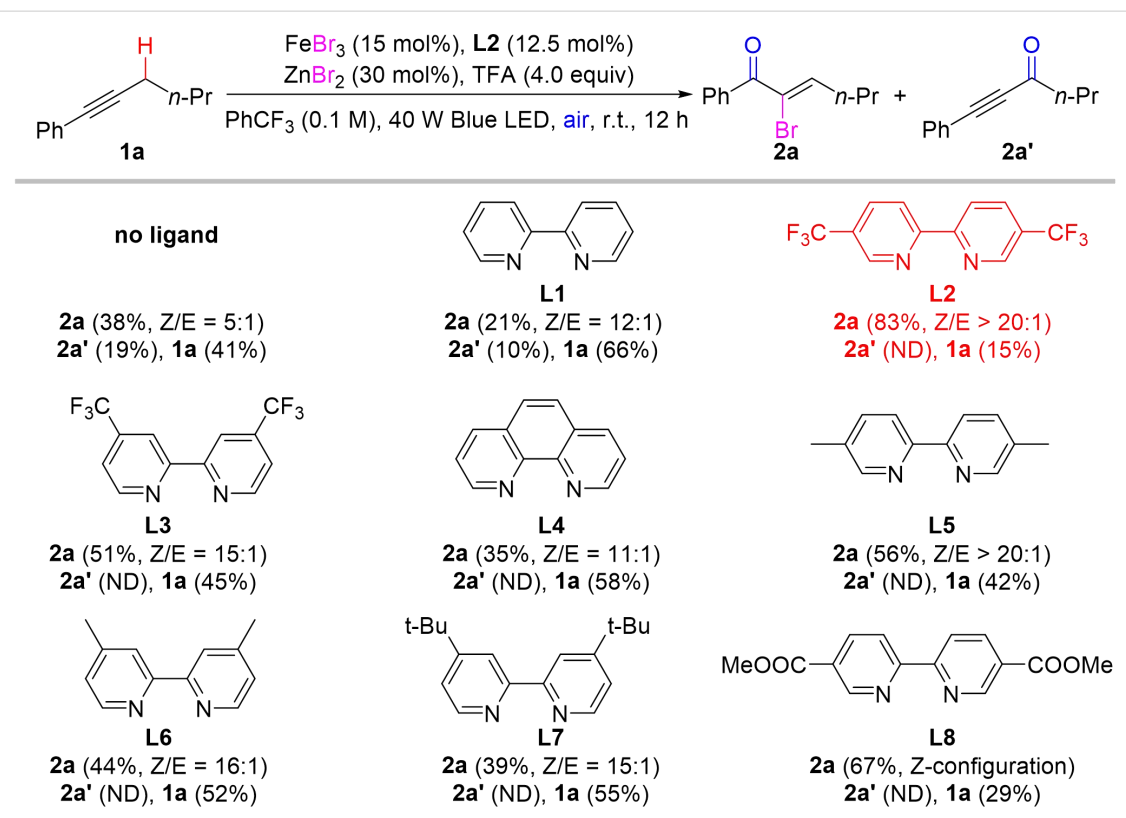

| Entry    | Catalyst                                             | "Br" salt                   | Acid       | Solvent                 | Yield (%) <sup>b</sup> |
|----------|------------------------------------------------------|-----------------------------|------------|-------------------------|------------------------|
| <b>1</b> | <b>FeBr<sub>3</sub></b>                              | <b>ZnBr<sub>2</sub></b>     | <b>TFA</b> | <b>PhCF<sub>3</sub></b> | <b>83</b>              |
| 2        | FeCl <sub>3</sub>                                    | ZnBr <sub>2</sub>           | TFA        | PhCF <sub>3</sub>       | 35                     |
| 3        | Fe(NO <sub>3</sub> ) <sub>3</sub> ·6H <sub>2</sub> O | ZnBr <sub>2</sub>           | TFA        | PhCF <sub>3</sub>       | 0                      |
| 4        | Fe(acac) <sub>3</sub>                                | ZnBr <sub>2</sub>           | TFA        | PhCF <sub>3</sub>       | 0                      |
| 5        | FeCl <sub>2</sub>                                    | ZnBr <sub>2</sub>           | TFA        | PhCF <sub>3</sub>       | 28                     |
| 7        | Fe(OAc) <sub>2</sub>                                 | ZnBr <sub>2</sub>           | TFA        | PhCF <sub>3</sub>       | 37                     |
| 8        | CoBr <sub>2</sub>                                    | ZnBr <sub>2</sub>           | TFA        | PhCF <sub>3</sub>       | 0                      |
| 9        | NiBr <sub>2</sub>                                    | ZnBr <sub>2</sub>           | TFA        | PhCF <sub>3</sub>       | 0                      |
| 10       | CuBr <sub>2</sub>                                    | ZnBr <sub>2</sub>           | TFA        | PhCF <sub>3</sub>       | 0                      |
| 11       | FeBr <sub>3</sub>                                    | KBr                         | TFA        | PhCF <sub>3</sub>       | 67                     |
| 12       | FeBr <sub>3</sub>                                    | NaBr                        | TFA        | PhCF <sub>3</sub>       | 15                     |
| 13       | FeBr <sub>3</sub>                                    | MgBr <sub>2</sub>           | TFA        | PhCF <sub>3</sub>       | 60                     |
| 14       | FeBr <sub>3</sub>                                    | TBAB                        | TFA        | PhCF <sub>3</sub>       | 44                     |
| 15       | FeBr <sub>3</sub>                                    | ZnBr <sub>2</sub> (10 mol%) | TFA        | PhCF <sub>3</sub>       | 34                     |
| 16       | FeBr <sub>3</sub>                                    | ZnBr <sub>2</sub> (20 mol%) | TFA        | PhCF <sub>3</sub>       | 46                     |
| 17       | FeBr <sub>3</sub>                                    | ZnBr <sub>2</sub> (40 mol%) | TFA        | PhCF <sub>3</sub>       | 65                     |
| 18       | FeBr <sub>3</sub>                                    | ZnBr <sub>2</sub> (50 mol%) | TFA        | PhCF <sub>3</sub>       | 54                     |
| 19       | FeBr <sub>3</sub>                                    | ZnBr <sub>2</sub>           | HOAc       | PhCF <sub>3</sub>       | 55                     |
| 20       | FeBr <sub>3</sub>                                    | ZnBr <sub>2</sub>           | PivOH      | PhCF <sub>3</sub>       | 37                     |
| 21       | FeBr <sub>3</sub>                                    | ZnBr <sub>2</sub>           | PhCOOH     | PhCF <sub>3</sub>       | 15                     |

|                 |                   |                   |                                  |                   |       |
|-----------------|-------------------|-------------------|----------------------------------|-------------------|-------|
| 22              | FeBr <sub>3</sub> | ZnBr <sub>2</sub> | <i>o</i> -NO <sub>2</sub> PhCOOH | PhCF <sub>3</sub> | 0     |
| 23              | FeBr <sub>3</sub> | ZnBr <sub>2</sub> | TFA (1.0 equiv)                  | PhCF <sub>3</sub> | 19    |
| 24              | FeBr <sub>3</sub> | ZnBr <sub>2</sub> | TFA (2.0 equiv)                  | PhCF <sub>3</sub> | 33    |
| 25              | FeBr <sub>3</sub> | ZnBr <sub>2</sub> | TFA (3.0 equiv)                  | PhCF <sub>3</sub> | 63    |
| 26              | FeBr <sub>3</sub> | ZnBr <sub>2</sub> | TFA (5.0 equiv)                  | PhCF <sub>3</sub> | 59    |
| 27              | FeBr <sub>3</sub> | ZnBr <sub>2</sub> | TFA                              | DMF               | 0     |
| 29              | FeBr <sub>3</sub> | ZnBr <sub>2</sub> | TFA                              | 1,4-dioxane       | 0     |
| 30              | FeBr <sub>3</sub> | ZnBr <sub>2</sub> | TFA                              | THF               | 0     |
| 32              | FeBr <sub>3</sub> | ZnBr <sub>2</sub> | TFA                              | NMP               | 0     |
| 33              | FeBr <sub>3</sub> | ZnBr <sub>2</sub> | TFA                              | TFE               | 0     |
| 34              | FeBr <sub>3</sub> | ZnBr <sub>2</sub> | TFA                              | DMSO              | 62    |
| 35              | FeBr <sub>3</sub> | ZnBr <sub>2</sub> | TFA                              | DCE               | 35    |
| 36              | FeBr <sub>3</sub> | ZnBr <sub>2</sub> | TFA                              | MeCN              | 72    |
| 37 <sup>c</sup> | FeBr <sub>3</sub> | ZnBr <sub>2</sub> | TFA                              | MeCN              | trace |
| 38 <sup>d</sup> | FeBr <sub>3</sub> | ZnBr <sub>2</sub> | TFA                              | MeCN              | 83    |
| 39 <sup>e</sup> | FeBr <sub>3</sub> | ZnBr <sub>2</sub> | TFA                              | MeCN              | 0     |
| 40              | FeBr <sub>3</sub> | ZnBr <sub>2</sub> | -                                | MeCN              | 18    |
| 41              | -                 | ZnBr <sub>2</sub> | TFA                              | MeCN              | <10   |
| 42              | FeBr <sub>3</sub> | -                 | TFA                              | MeCN              | 40    |

<sup>a</sup>Reactions were carried out by using **1a** (0.1 mmol), Catalyst (0.015 mmol), ligand (0.0125 mmol), Br salt (0.03 mmol), acid (0.4 mmol), and solvent (1.0 mL) with 40 W blue LED irradiation under air at room temperature for 12 h. <sup>b</sup>Isolated yield. The ratio of Z/E configuration was determined by <sup>1</sup>H NMR. <sup>c</sup>N<sub>2</sub> atmosphere. <sup>d</sup>O<sub>2</sub> atmosphere. <sup>e</sup>No light.

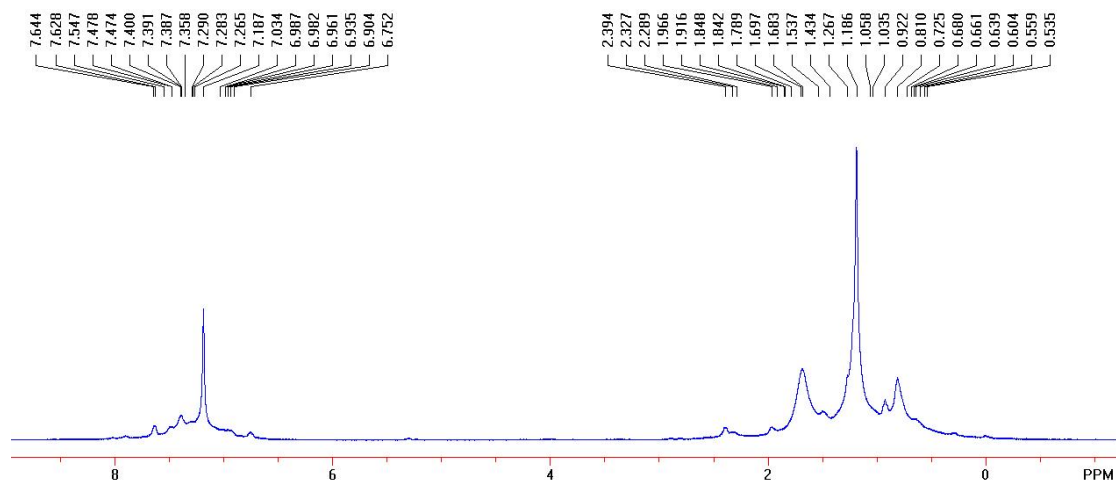

**Figure S1** The crude reaction mixture of entry 1 was analyzed by <sup>1</sup>H NMR

## Typical Procedure for Photoinduced Iron-Catalyzed LMCT Enables Propargylic C(sp<sup>3</sup>)-H Activation to Access Polysubstituted Z-Configured $\alpha$ -Bromoenones

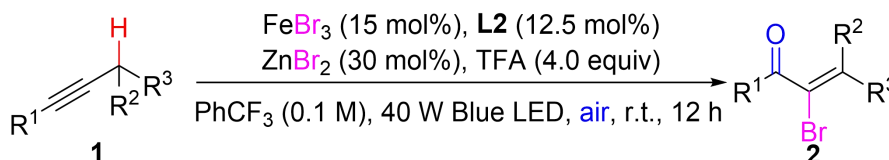

A 25 mL thick wall pressure sealed tube was charged with **1** (0.1 mmol), FeBr<sub>3</sub> (4.4 mg, 0.015 mmol), L2 (3.6 mg, 0.0125 mmol), ZnBr<sub>2</sub> (6.8 mg, 0.03 mmol), TFA (45.8 mg, 0.4 mmol), and PhCF<sub>3</sub> (1.0 mL) with 40 W blue LED irradiation under air at room temperature for 12 h. The mixture was then cooled to room temperature, diluted with EtOAc, filtered through a celite pad, and concentrated in vacuo. The residue was purified by flash column chromatography on silica gel, eluting with EtOAc/PE (1:40 ~ 1:30, v/v), to give the corresponding product **2**.

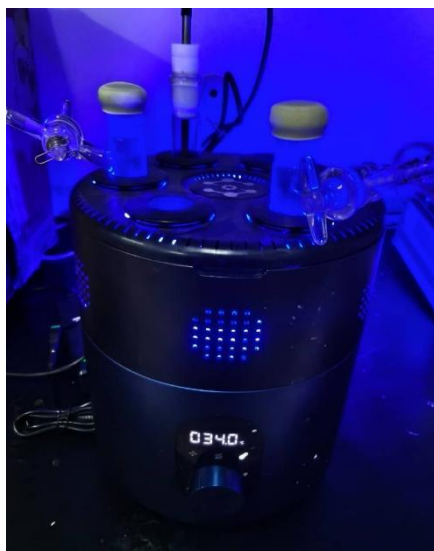

Figure S2 Reaction setup

## Analytical Data for Products

### (Z)-2-bromo-1-phenylhex-2-en-1-one (2a)

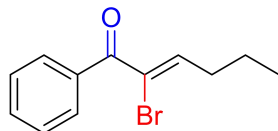

Rf 0.36 (PE/EtOAc = 40/1). 83%, 20.9 mg. Yellow oil;  $^1\text{H}$  NMR ( $\text{CDCl}_3$ , 400 MHz)  $\delta$  7.63 (d,  $J = 7.6$  Hz, 2H), 7.49 (t,  $J = 7.6$  Hz, 1H), 7.40-7.36 (m, 2H), 6.76 (t,  $J = 7.2$  Hz, 1H), 2.39 (dd,  $J_1 = 7.2$  Hz;  $J_2 = 16.8$  Hz, 2H), 1.51-1.43 (m, 2H), 0.91 (t,  $J = 7.2$  Hz, 3H).  $^{13}\text{C}$  NMR ( $\text{CDCl}_3$ , 100 MHz)  $\delta$  190.5, 147.9, 136.7, 132.4, 129.5, 128.4, 126.2, 34.5, 21.1, 13.8. HRMS (EI-TOF) calcd for  $\text{C}_{12}\text{H}_{13}\text{BrO}$  ( $\text{M}^+$ ): 252.0150, found: 252.0151.

### (Z)-2-bromo-1-(3,4-dimethoxyphenyl)hex-2-en-1-one (2b)

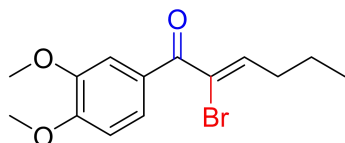

Rf 0.30 (PE/EA = 5/1). 57%, 17.8 mg. Yellow oil;  $^1\text{H}$  NMR ( $\text{CDCl}_3$ , 400 MHz)  $\delta$  8.01 (d,  $J = 8.0$  Hz, 1H), 7.52 (d,  $J = 8.4$  Hz, 1H), 7.46 (s, 1H), 6.81 (d,  $J = 8.4$  Hz, 1H), 3.87 (s, 6H), 2.85 (t,  $J = 7.2$  Hz, 2H), 1.66 (s, 2H), 0.84 (s, 3H).  $^{13}\text{C}$  NMR ( $\text{CDCl}_3$ , 100 MHz)  $\delta$  199.3, 153.1, 149.0, 130.4, 123.4, 122.7, 110.2, 109.9, 56.0, 55.9, 38.1, 22.5, 14.0. HRMS (EI-TOF) calcd for  $\text{C}_{14}\text{H}_{17}\text{BrO}_3$  ( $\text{M}^+$ ): 312.0361, found: 312.0368.

### (Z)-1-([1,1'-biphenyl]-4-yl)-2-bromohex-2-en-1-one (2c)

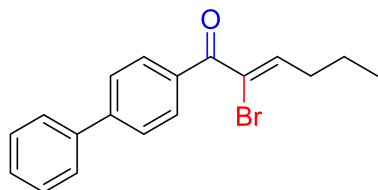

Rf 0.32 (PE/EA = 40/1). 62%, 20.3 mg. Yellow oil;  $^1\text{H}$  NMR ( $\text{CDCl}_3$ , 400 MHz)  $\delta$  7.74 (d,  $J = 7.6$  Hz, 2H), 7.62 (d,  $J = 7.2$  Hz, 2H), 7.57 (d,  $J = 6.8$  Hz, 2H), 7.42-7.35 (m, 3H), 6.81 (t,  $J = 6.8$  Hz, 1H), 2.43-2.39 (m, 2H), 1.51 (dd,  $J_1 = 7.2$  Hz;  $J_2 = 14.8$

Hz, 2H), 0.94 (t,  $J = 7.2$  Hz, 3H).  $^{13}\text{C}$  NMR ( $\text{CDCl}_3$ , 100 MHz)  $\delta$  190.2, 147.6, 145.4, 139.8, 135.3, 130.2, 129.0, 128.7, 128.3, 127.3, 127.1, 34.5, 21.1, 13.9. HRMS (EI-TOF) calcd for  $\text{C}_{18}\text{H}_{17}\text{BrO}$  ( $\text{M}^+$ ): 328.0463, found: 328.0469.

**(Z)-2-bromo-1-(4-isopropylphenyl)hex-2-en-1-one (2d)**

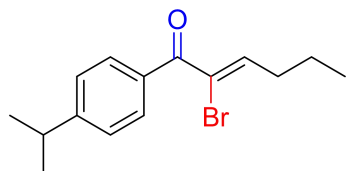

Rf 0.28 (PE/EtOAc = 40/1). 72%, 21.1 mg. Yellow oil;  $^1\text{H}$  NMR ( $\text{CDCl}_3$ , 400 MHz)  $\delta$  7.59 (d,  $J = 8.4$  Hz, 2H), 7.20 (d,  $J = 13.2$  Hz, 2H), 6.73 (t,  $J = 7.2$  Hz, 1H), 2.92-2.84 (m, 1H), 2.40-2.35 (m, 2H), 1.55-1.44 (m, 2H), 1.21 (s, 3H), 1.19 (s, 3H), 0.92 (t,  $J = 7.2$  Hz, 3H).  $^{13}\text{C}$  NMR ( $\text{CDCl}_3$ , 100 MHz)  $\delta$  190.4, 154.3, 147.2, 135.0, 129.9, 128.3, 126.6, 38.5, 34.2, 23.7, 22.5, 14.0. HRMS (EI-TOF) calcd for  $\text{C}_{15}\text{H}_{19}\text{BrO}$  ( $\text{M}^+$ ): 294.0619, found: 294.0622.

**(Z)-2-bromo-1-(4-(tert-butyl)phenyl)hex-2-en-1-one (2e)**

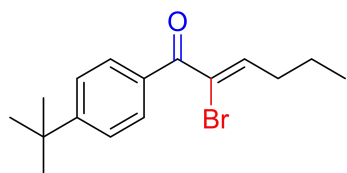

Rf 0.28 (PE/EtOAc = 40/1). 73%, 22.5 mg. Yellow oil;  $^1\text{H}$  NMR ( $\text{CDCl}_3$ , 400 MHz)  $\delta$  7.60 (d,  $J = 8.4$  Hz, 2H), 7.40 (t,  $J = 6.0$  Hz, 2H), 6.73 (t,  $J = 7.2$  Hz, 1H), 2.41-2.35 (m, 2H), 1.53-1.44 (m, 2H), 1.27 (s, 9H), 0.92 (t,  $J = 7.2$  Hz, 3H).  $^{13}\text{C}$  NMR ( $\text{CDCl}_3$ , 100 MHz)  $\delta$  190.4, 156.6, 147.2, 134.6, 129.6, 128.1, 125.4, 38.5, 35.1, 31.1, 22.5, 13.9. HRMS (EI-TOF) calcd for  $\text{C}_{16}\text{H}_{21}\text{BrO}$  ( $\text{M}^+$ ): 308.0776, found: 308.0778.

**(Z)-2-bromo-1-(p-tolyl)hex-2-en-1-one (2f)**

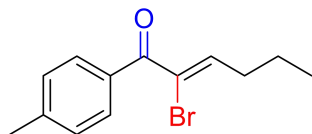

Rf 0.28 (PE/EtOAc = 40/1). 72%, 19.1 mg. Yellow oil;  $^1\text{H}$  NMR ( $\text{CDCl}_3$ , 400 MHz)  $\delta$

7.56 (d,  $J = 7.6$  Hz, 2H), 7.19 (t,  $J = 7.6$  Hz, 2H), 6.71 (t,  $J = 7.2$  Hz, 1H), 2.40-2.35 (m, 5H), 1.51-1.45 (m, 2H), 0.91 (t,  $J = 7.2$  Hz, 3H).  $^{13}\text{C}$  NMR ( $\text{CDCl}_3$ , 100 MHz)  $\delta$  190.3, 146.9, 143.3, 133.9, 129.8, 129.1, 126.0, 34.4, 29.7, 21.1, 13.8. HRMS (EI-TOF) calcd for  $\text{C}_{13}\text{H}_{15}\text{BrO}$  ( $\text{M}^+$ ): 266.0306, found: 266.0306.

**(Z)-2-bromo-1-(m-tolyl)hex-2-en-1-one (2g)**

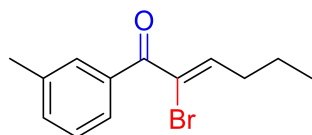

Rf 0.29 (PE/EA = 40/1). 69%, 18.3 mg. Yellow oil;  $^1\text{H}$  NMR ( $\text{CDCl}_3$ , 400 MHz)  $\delta$  7.45 (s, 1H), 7.41 (d,  $J = 7.2$  Hz, 1H), 7.29-7.26 (m, 2H), 6.75 (t,  $J = 7.2$  Hz, 1H), 2.39 (dd,  $J_1 = 8.0$  Hz;  $J_2 = 16.8$  Hz, 2H), 2.34 (s, 3H), 1.51-1.45 (m, 2H), 0.92 (t,  $J = 7.2$  Hz, 3H).  $^{13}\text{C}$  NMR ( $\text{CDCl}_3$ , 100 MHz)  $\delta$  190.7, 147.8, 138.3, 136.8, 133.2, 130.0, 128.1, 126.7, 126.3, 34.5, 21.3, 21.1, 13.8. HRMS (EI-TOF) calcd for  $\text{C}_{13}\text{H}_{15}\text{BrO}$  ( $\text{M}^+$ ): 266.0306, found: 266.0307.

**6-(4-chlorophenyl)-3-morpholino-N-(quinolin-8-yl)hex-5-ynamide (2h)**

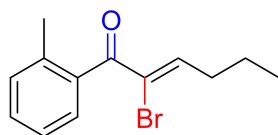

Rf 0.31 (PE/EA = 40/1). 71%, 18.9 mg. Yellow oil;  $^1\text{H}$  NMR ( $\text{CDCl}_3$ , 400 MHz)  $\delta$  7.28 (s, 1H), 7.181 (d,  $J = 10.0$  Hz, 3H), 6.71 (t,  $J = 7.2$  Hz, 1H), 2.39-2.33 (m, 2H), 2.23 (s, 3H), 1.46-1.38 (m, 2H), 0.87 (t,  $J = 7.2$  Hz, 3H).  $^{13}\text{C}$  NMR ( $\text{CDCl}_3$ , 100 MHz)  $\delta$  192.2, 151.0, 137.9, 136.3, 130.9, 130.2, 129.1, 127.7, 125.3, 34.7, 20.1, 19.5, 13.8. HRMS (EI-TOF) calcd for  $\text{C}_{13}\text{H}_{15}\text{BrO}$  ( $\text{M}^+$ ): 266.0306, found: 266.0309.

**(Z)-2-bromo-1-(4-bromophenyl)hex-2-en-1-one (2i)**

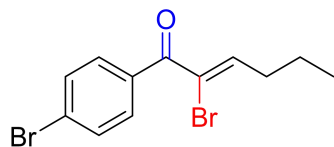

Rf 0.39 (PE/EA = 40/1). 50%, 16.5 mg. Yellow oil;  $^1\text{H}$  NMR ( $\text{CDCl}_3$ , 400 MHz)  $\delta$  7.58-7.45 (m, 4H), 6.73 (t,  $J = 6.8$  Hz, 1H), 2.38 (dd,  $J_1 = 6.8$  Hz;  $J_2 = 14.0$  Hz, 2H),

1.49 (dd,  $J_1 = 7.2$  Hz;  $J_2 = 14.8$  Hz, 2H), 0.91 (t,  $J = 7.2$  Hz, 3H).  $^{13}\text{C}$  NMR ( $\text{CDCl}_3$ , 100 MHz)  $\delta$  189.5, 148.1, 135.4, 131.7, 131.0, 127.5, 125.7, 34.5, 21.1, 13.9. HRMS (EI-TOF) calcd for  $\text{C}_{12}\text{H}_{12}\text{Br}_2\text{O}$  ( $\text{M}^+$ ): 329.9255, found: 329.9259.

**(Z)-2-bromo-1-(2-bromophenyl)hex-2-en-1-one (2j)**

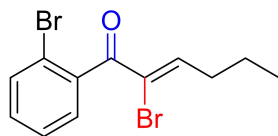

Rf 0.25 (PE/EA = 40/1). 65%, 21.4 mg. Yellow oil;  $^1\text{H}$  NMR ( $\text{CDCl}_3$ , 400 MHz)  $\delta$  7.53 (d,  $J = 7.6$  Hz, 1H), 7.34-7.20 (m, 2H), 7.18 (d,  $J = 1.6$  Hz, 1H), 6.72 (t,  $J = 7.2$  Hz, 1H), 2.37 (dd,  $J_1 = 6.8$  Hz;  $J_2 = 14.4$  Hz, 2H), 1.48-1.37 (m, 2H), 0.87 (t,  $J = 7.2$  Hz, 3H).  $^{13}\text{C}$  NMR ( $\text{CDCl}_3$ , 100 MHz)  $\delta$  189.7, 152.4, 139.9, 133.2, 131.3, 138.7, 127.7, 127.2, 119.4, 34.8, 20.8, 13.8. HRMS (EI-TOF) calcd for  $\text{C}_{12}\text{H}_{12}\text{Br}_2\text{O}$  ( $\text{M}^+$ ): 329.9255, found: 329.9256.

**(Z)-2-bromo-1-(4-chlorophenyl)hex-2-en-1-one (2k)**

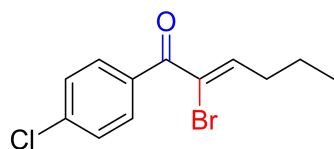

Rf = 0.31 (PE/EA = 40/1). 66%, 18.8 mg. Yellow oil;  $^1\text{H}$  NMR ( $\text{CDCl}_3$ , 400 MHz)  $\delta$  7.59 (d,  $J = 8.4$  Hz, 2H), 7.37 (d,  $J = 8.0$  Hz, 2H), 6.73 (t,  $J = 7.2$  Hz, 1H), 2.38 (t,  $J = 7.2$  Hz, 2H), 1.51-1.46 (m, 2H), 0.92 (t,  $J = 7.2$  Hz, 3H).  $^{13}\text{C}$  NMR ( $\text{CDCl}_3$ , 100 MHz)  $\delta$  189.4, 147.8, 139.0, 134.9, 130.9, 128.7, 125.6, 34.5, 21.1, 13.8. HRMS (EI-TOF) calcd for  $\text{C}_{12}\text{H}_{12}\text{BrClO}$  ( $\text{M}^+$ ): 285.9760, found: 285.9767.

**(Z)-2-bromo-1-(4-fluorophenyl)hex-2-en-1-one (2l)**

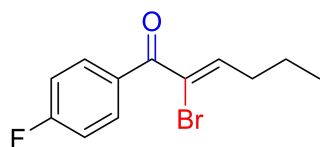

Rf 0.36 (PE/EA = 40/1). 70%, 18.9 mg. Yellow oil;  $^1\text{H}$  NMR ( $\text{CDCl}_3$ , 400 MHz)  $\delta$  7.70-7.67 (m, 2H), 7.07 (t,  $J = 8.4$  Hz, 2H), 6.71 (t,  $J = 7.2$  Hz, 1H), 2.39 (dd,  $J_1 = 6.8$

Hz;  $J_2 = 14.4$  Hz, 2H), 1.49 (dd,  $J_1 = 7.2$  Hz;  $J_2 = 14.8$  Hz, 2H), 0.92 (t,  $J = 7.2$  Hz, 3H).  $^{13}\text{C}$  NMR ( $\text{CDCl}_3$ , 100 MHz)  $\delta$  189.2, 165.4 (d,  $J_{\text{C-F}} = 253.2$  Hz), 147.2, 132.4 (d,  $J_{\text{C-F}} = 62.4$  Hz), 125.4, 124.2 (d,  $J_{\text{C-F}} = 49.3$  Hz), 115.6 (d,  $J_{\text{C-F}} = 22.0$  Hz), 34.4, 21.1, 13.9. HRMS (EI-TOF) calcd for  $\text{C}_{12}\text{H}_{12}\text{BrFO}$  ( $\text{M}^+$ ): 270.0056, found: 270.0058.

**(Z)-2-bromo-1-(4-nitrophenyl)hex-2-en-1-one (2m)**

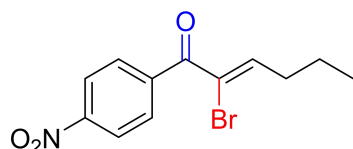

Rf = 0.18 (PE/EA = 40/1). 61%, 18.1 mg. Yellow oil;  $^1\text{H}$  NMR ( $\text{CDCl}_3$ , 400 MHz)  $\delta$  8.25 (d,  $J = 8.0$  Hz, 2H), 7.76 (d,  $J = 8.0$  Hz, 2H), 6.79 (t,  $J = 6.8$  Hz, 1H), 2.42 (dd,  $J_1 = 7.2$  Hz;  $J_2 = 14.4$  Hz, 2H), 1.49 (dd,  $J_1 = 7.2$  Hz;  $J_2 = 14.4$  Hz, 2H), 0.92 (t,  $J = 7.2$  Hz, 3H).  $^{13}\text{C}$  NMR ( $\text{CDCl}_3$ , 100 MHz)  $\delta$  188.8, 150.3, 149.9, 142.2, 130.1, 125.8, 123.6, 34.7, 21.0, 13.9. HRMS (EI-TOF) calcd for  $\text{C}_{12}\text{H}_{12}\text{BrNO}_3$  ( $\text{M}^+$ ): 297.0001, found: 297.0001.

**(Z)-1-(4-acetylphenyl)-2-bromohex-2-en-1-one (2n)**

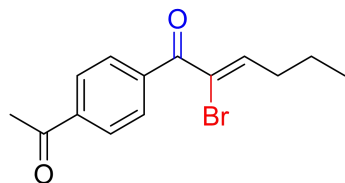

Rf 0.23 (PE/EA = 10/1). 63%, 18.5 mg. Yellow oil;  $^1\text{H}$  NMR ( $\text{CDCl}_3$ , 400 MHz)  $\delta$  7.96 (d,  $J = 7.6$  Hz, 2H), 7.69 (d,  $J = 7.2$  Hz, 2H), 6.77 (s, 1H), 2.59 (s, 3H), 2.40 (d,  $J = 5.6$  Hz, 2H), 1.48 (d,  $J = 6.0$  Hz, 2H), 0.92 (t,  $J = 5.6$  Hz, 3H).  $^{13}\text{C}$  NMR ( $\text{CDCl}_3$ , 100 MHz)  $\delta$  197.2, 189.8, 149.3, 140.6, 139.7, 129.5, 128.2, 126.1, 34.6, 26.7, 21.0, 13.8. HRMS (EI-TOF) calcd for  $\text{C}_{14}\text{H}_{15}\text{BrO}_2$  ( $\text{M}^+$ ): 294.0255, found: 294.0259.

**(Z)-2-bromo-1-(naphthalen-1-yl)hex-2-en-1-one (2o)**

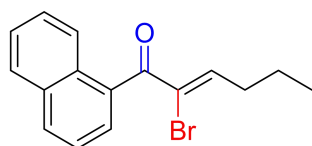

Rf 0.30 (PE/EA = 40/1). 49%, 14.8 mg. Yellow oil;  $^1\text{H}$  NMR ( $\text{CDCl}_3$ , 400 MHz)  $\delta$  7.91-7.82 (m, 3H), 7.48-7.41 (m, 4H), 6.78 (t,  $J = 6.8$  Hz, 1H), 2.36 (dd,  $J_1 = 7.6$  Hz;  $J_2 = 14.4$  Hz, 2H), 1.38 (dd,  $J_1 = 7.2$  Hz;  $J_2 = 14.4$  Hz, 2H), 0.83 (t,  $J = 7.2$  Hz, 3H).  $^{13}\text{C}$  NMR ( $\text{CDCl}_3$ , 100 MHz)  $\delta$  191.6, 151.6, 135.6, 133.6, 131.2, 130.8, 129.4, 128.4, 127.4, 126.7, 126.6, 125.3, 124.3, 34.8, 20.9, 13.8. HRMS(EI-TOF) calcd for  $\text{C}_{16}\text{H}_{15}\text{BrO}$  ( $\text{M}^+$ ): 302.0306, found: 302.0310.

**(Z)-2-bromo-1-(thiophen-2-yl)hex-2-en-1-one (2p)**

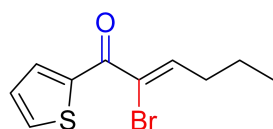

Rf 0.23 (PE/EA = 40/1). 58%, 14.9 mg. Yellow oil;  $^1\text{H}$  NMR ( $\text{CDCl}_3$ , 400 MHz)  $\delta$  7.85 (s, 1H), 7.42 (d,  $J = 4.8$  Hz, 1H), 7.29 (d,  $J = 2.8$  Hz, 1H), 6.88 (t,  $J = 6.8$  Hz, 1H), 2.39 (dd,  $J_1 = 7.2$  Hz;  $J_2 = 14.4$  Hz, 2H), 1.51 (dd,  $J_1 = 7.2$  Hz;  $J_2 = 14.4$  Hz, 2H), 0.94 (t,  $J = 7.2$  Hz, 3H).  $^{13}\text{C}$  NMR ( $\text{CDCl}_3$ , 100 MHz)  $\delta$  194.9, 145.8, 133.0, 131.5, 128.4, 127.0, 126.2, 31.5, 22.5, 13.9. HRMS (EI-TOF) calcd for  $\text{C}_{10}\text{H}_{11}\text{BrOS}$  ( $\text{M}^+$ ): 257.9714, found: 257.9719.

**(Z)-2-bromo-1-(dibenzo[b,d]furan-1-yl)hex-2-en-1-one (2q)**

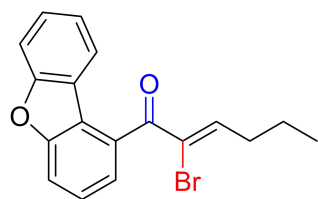

Rf 0.25 (PE/EA = 40/1). 47%, 16.1 mg. Yellow oil;  $^1\text{H}$  NMR ( $\text{CDCl}_3$ , 400 MHz)  $\delta$  7.85 (d,  $J = 8.0$  Hz, 1H), 7.64 (d,  $J = 8.0$  Hz, 1H), 7.50 (d,  $J = 8.4$  Hz, 1H), 7.42 (d,  $J = 7.2$  Hz, 2H), 7.36 (t,  $J = 7.2$  Hz, 1H), 7.23 (t,  $J = 7.2$  Hz, 1H), 6.86 (t,  $J = 7.2$  Hz, 1H), 2.36 (dd,  $J_1 = 7.2$  Hz;  $J_2 = 14.4$  Hz, 2H), 1.37 (dd,  $J_1 = 7.2$  Hz;  $J_2 = 14.4$  Hz, 2H), 0.81 (t,  $J = 7.2$  Hz, 3H).  $^{13}\text{C}$  NMR ( $\text{CDCl}_3$ , 100 MHz)  $\delta$  190.2, 156.7, 156.4, 151.5, 131.9, 128.2, 128.0, 126.3, 123.9, 123.8, 123.0, 122.9, 122.3, 114.7, 111.6, 34.9, 20.9, 13.8. HRMS (EI-TOF) calcd for  $\text{C}_{18}\text{H}_{15}\text{BrO}_2$  ( $\text{M}^+$ ): 342.0255, found: 342.0256.

**(Z)-2-bromo-1-phenylbut-2-en-1-one (2r)**

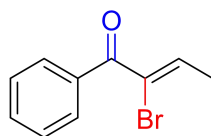

Rf 0.28 (PE/EA = 4/1). 85%, 19.0 mg. Yellow oil;  $^1\text{H}$  NMR ( $\text{CDCl}_3$ , 400 MHz)  $\delta$  7.62 (d,  $J = 7.2$  Hz, 2H), 7.51-7.47 (m, 1H), 7.38 (t,  $J = 7.6$  Hz, 2H), 6.88-6.83 (m, 1H), 2.00 (d,  $J = 6.8$  Hz, 3H).  $^{13}\text{C}$  NMR ( $\text{CDCl}_3$ , 100 MHz)  $\delta$  190.5, 143.3, 136.7, 132.3, 129.4, 128.4, 127.7, 18.3. HRMS (EI-TOF) calcd for  $\text{C}_{10}\text{H}_9\text{BrO}$  ( $\text{M}^+$ ): 223.9837, found: 223.9842.

**(Z)-2-bromo-1-phenylpent-2-en-1-one (2s)**

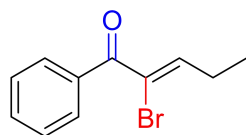

Rf 0.32 (PE/EA = 40/1). 75%, 17.8 mg. Yellow oil;  $^1\text{H}$  NMR ( $\text{CDCl}_3$ , 400 MHz)  $\delta$  7.63 (d,  $J = 7.2$  Hz, 2H), 7.52-7.48 (m, 1H), 7.41-7.37 (m, 2H), 6.76 (d,  $J = 6.8$  Hz, 1H), 2.44-2.40 (m, 2H), 1.05 (t,  $J = 7.2$  Hz, 3H).  $^{13}\text{C}$  NMR ( $\text{CDCl}_3$ , 100 MHz)  $\delta$  190.6, 149.3, 136.7, 132.4, 129.5, 128.4, 125.6, 26.1, 12.0. HRMS (EI-TOF) calcd for  $\text{C}_{11}\text{H}_{11}\text{BrO}$  ( $\text{M}^+$ ): 237.9993, found: 237.9998.

**(Z)-2-bromo-1-phenylhept-2-en-1-one (2t)**

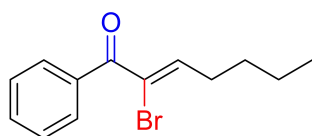

Rf 0.32 (PE/EA = 40/1). 70%, 18.6 mg. Yellow oil;  $^1\text{H}$  NMR ( $\text{CDCl}_3$ , 400 MHz)  $\delta$  7.69 (d,  $J = 7.2$  Hz, 2H), 7.58-7.54 (m, 1H), 7.45 (t,  $J = 7.2$  Hz, 2H), 6.82 (d,  $J = 7.2$  Hz, 1H), 2.48 (dd,  $J_1 = 7.2$  Hz;  $J_2 = 14.0$  Hz, 2H), 1.49 (dd,  $J_1 = 7.2$  Hz;  $J_2 = 14.0$  Hz, 2H), 1.41-1.33 (m, 2H), 0.93 (t,  $J = 7.2$  Hz, 3H).  $^{13}\text{C}$  NMR ( $\text{CDCl}_3$ , 100 MHz)  $\delta$  190.5, 148.2, 136.8, 132.4, 129.5, 128.4, 126.1, 32.3, 29.8, 22.4, 13.8. HRMS (EI-TOF) calcd for  $\text{C}_{13}\text{H}_{15}\text{BrO}$  ( $\text{M}^+$ ): 266.0306, found: 266.0306.

**(Z)-2-bromo-6-chloro-1-phenylhex-2-en-1-one (2u)**

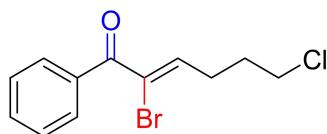

Rf 0.21 (PE/EA = 40/1). 72%, 20.6 mg. Yellow oil;  $^1\text{H}$  NMR ( $\text{CDCl}_3$ , 400 MHz)  $\delta$  7.64 (d,  $J = 7.2$  Hz, 2H), 7.50 (d,  $J = 6.8$  Hz, 1H), 7.41 (d,  $J = 6.8$  Hz, 2H), 6.75 (t,  $J = 6.4$  Hz, 1H), 3.52 (s, 2H), 2.58 (d,  $J = 6.8$  Hz, 2H), 1.93 (t,  $J = 6.0$  Hz, 2H).  $^{13}\text{C}$  NMR ( $\text{CDCl}_3$ , 100 MHz)  $\delta$  190.4, 145.5, 136.4, 132.6, 131.6, 129.6, 128.5, 44.1, 30.5, 30.0. HRMS (EI-TOF) calcd for  $\text{C}_{12}\text{H}_{12}\text{BrClO}$  ( $\text{M}^+$ ): 285.9760, found: 285.9766.

**(Z)-3-bromo-4-oxo-4-phenylbut-2-en-1-yl acetate (2v)**

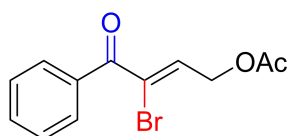

Rf 0.25 (PE/EtOAc = 10/1). 66%, 18.6 mg. Yellow oil;  $^1\text{H}$  NMR ( $\text{CDCl}_3$ , 400 MHz)  $\delta$  7.79 (d,  $J = 7.6$  Hz, 2H), 7.58-7.52 (m, 1H), 7.46-7.40 (m, 2H), 6.81 (t,  $J = 4.8$  Hz, 1H), 4.86 (d,  $J = 4.8$  Hz, 2H), 2.03 (s, 3H).  $^{13}\text{C}$  NMR ( $\text{CDCl}_3$ , 100 MHz)  $\delta$  192.4, 170.8, 140.6, 138.8, 133.8, 129.7, 128.6, 125.6, 61.8, 20.6. HRMS (EI-TOF) calcd for  $\text{C}_{12}\text{H}_{11}\text{BrO}_3$  ( $\text{M}^+$ ): 281.9892, found: 281.9892.

**2-bromo-3-methyl-1-phenylbut-2-en-1-one (2w)**

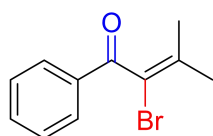

Rf 0.42 (PE/EA = 40/1). 85%, 20.2 mg. Yellow oil;  $^1\text{H}$  NMR ( $\text{CDCl}_3$ , 400 MHz)  $\delta$  7.89 (d,  $J = 7.6$  Hz, 2H), 7.55-7.51 (m, 1H), 7.44-7.40 (m, 2H), 2.07 (s, 3H), 1.73 (s, 3H).  $^{13}\text{C}$  NMR ( $\text{CDCl}_3$ , 100 MHz)  $\delta$  191.8, 138.5, 135.0, 133.7, 129.9, 128.7, 112.1, 23.9, 22.0. HRMS (EI-TOF) calcd for  $\text{C}_{11}\text{H}_{11}\text{BrO}$  ( $\text{M}^+$ ): 237.9993, found: 237.9996.

**(Z)-2-bromo-3,4-dimethyl-1-phenylpent-2-en-1-one (2x)**

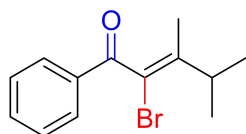

R<sub>f</sub> = 0.40 (PE/EA = 40/1). 60%, 15.9 mg. Yellow oil. <sup>1</sup>H NMR (CDCl<sub>3</sub>, 400 MHz) δ 7.51 (d, *J* = 6.8 Hz, 2H), 7.42-7.38 (m, 1H), 7.33 (d, *J* = 7.2 Hz, 2H), 2.39 (s, 3H), 1.97-1.92 (m, 1H), 1.24 (d, *J* = 19.2 Hz, 6H). <sup>13</sup>C NMR (CDCl<sub>3</sub>, 100 MHz) δ 191.6, 144.2, 134.2, 133.0, 130.7, 128.6, 117.9, 29.7, 22.5, 13.0. HRMS (EI-TOF) calcd for C<sub>13</sub>H<sub>15</sub>BrO(M<sup>+</sup>): 266.0306, found: 266.0310.

### 2-bromo-1-phenylprop-2-en-1-one (2y)

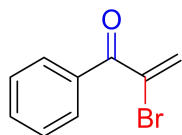

R<sub>f</sub> 0.31 (PE/EA = 40/1). 79%, 16.6 mg. Yellow oil; <sup>1</sup>H NMR (CDCl<sub>3</sub>, 400 MHz) δ 7.74 (d, *J* = 6.8 Hz, 2H), 7.55-7.51 (m, 1H), 7.41 (t, *J* = 7.2 Hz, 2H), 6.48 (s, 1H), 6.41 (s, 1H). <sup>13</sup>C NMR (CDCl<sub>3</sub>, 100 MHz) δ 190.2, 135.2, 133.2, 129.9, 129.7, 129.5, 128.7. HRMS (EI-TOF) calcd for C<sub>9</sub>H<sub>7</sub>BrO (M<sup>+</sup>): 209.9680, found: 209.9680.

## Large-scale synthesis of **2a** and **2w**

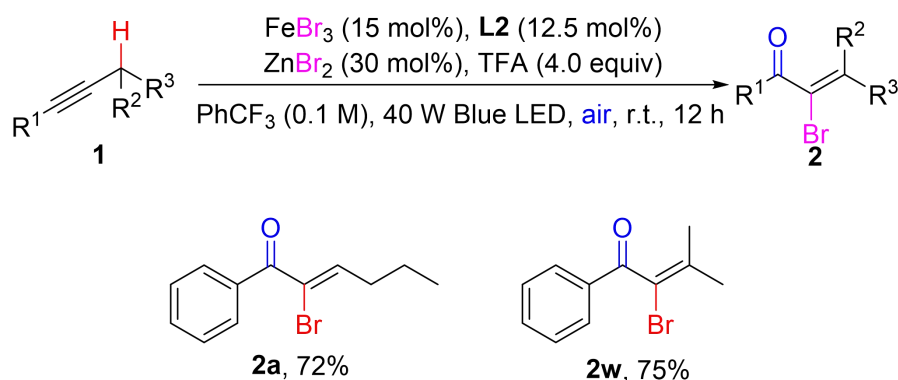

A 25 mL thick wall pressure sealed tube was charged with **1a** (1.0 mmol),  $FeBr_3$  (44.0 mg, 0.15 mmol), **L2** (36 mg, 0.125 mmol),  $ZnBr_2$  (68 mg, 0.3 mmol), TFA (458 mg, 4.0 mmol), and  $PhCF_3$  (10.0 mL) with 40 W blue LED irradiation under air at room temperature for 12 h. The mixture was then cooled to room temperature, diluted with EtOAc, filtered through a celite pad, and concentrated in vacuo. The residue was purified by flash column chromatography on silica gel, eluting with EtOAc/PE (1:40 ~ 1:30, v/v), to give the corresponding product **2a** (72%).

A 25 mL thick wall pressure sealed tube was charged with **1w** (1.0 mmol),  $FeBr_3$  (44.0 mg, 0.15 mmol), **L2** (36 mg, 0.125 mmol),  $ZnBr_2$  (68 mg, 0.3 mmol), TFA (458 mg, 4.0 mmol), and  $PhCF_3$  (10.0 mL) with 40 W blue LED irradiation under air at room temperature for 12 h. The mixture was then cooled to room temperature, diluted with EtOAc, filtered through a celite pad, and concentrated in vacuo. The residue was purified by flash column chromatography on silica gel, eluting with EtOAc/PE (1:40 ~ 1:30, v/v), to give the corresponding product **2w** (75%).

## Product diversification

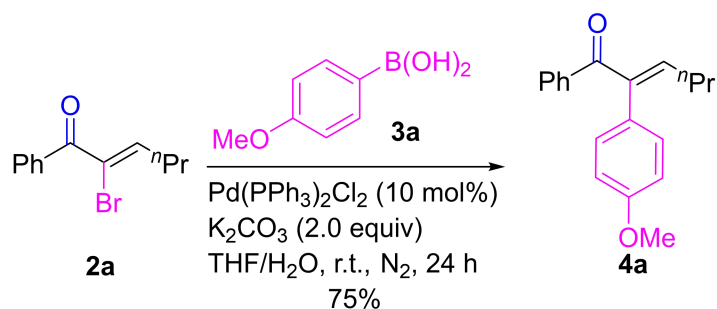

The deprotection was accomplished by adapting a literature procedure.<sup>1</sup> To an oven-dried microwave vial equipped with a magnetic stir bar was added 4-methoxyphenylboronic acid (18.24 mg, 0.12 mmol), K<sub>2</sub>CO<sub>3</sub> (22 mg, 0.16 mmol), and Pd(PPh<sub>3</sub>)<sub>2</sub>Cl<sub>2</sub> (5.6 mg, 0.0080 mmol). The vial was placed under an atmosphere of nitrogen and freshly sparged (N<sub>2</sub>, 15 minutes), THF (0.05 mL) and H<sub>2</sub>O (0.05 mL) was added. To this mixture was added the vinyl bromide (20.14 mg, 0.0799 mmol) in freshly sparged (N<sub>2</sub>, 15 minutes), THF (0.2 mL). The reaction was stirred at rt for 23 hr. At that point, the reaction mixture was filtered through a small plug of silica (diethyl ether) and concentrated under reduced pressure. The resulting residue was purified via flash chromatography (Petroleum ether/Et<sub>2</sub>O 8:1 to 5:1) to afford the (E)-2-(4-methoxyphenyl)-1-phenylhex-2-en-1-one **4a** as a pale yellow oil (16.78 mg, 75%). <sup>1</sup>H NMR (400 MHz, CDCl<sub>3</sub>) δ 7.70 (d, *J* = 7.2 Hz, 2H), 7.44-7.40 (m, 1H), 7.36 (d, *J* = 7.6 Hz, 2H), 7.11 (d, *J* = 8.8 Hz, 2H), 6.85 (d, *J* = 8.4 Hz, 2H), 6.35 (t, *J* = 7.2 Hz, 1H), 3.75 (s, 3H), 2.21-2.16 (m, 2H), 1.43-1.38 (m, 2H), 0.84 (t, *J* = 7.2 Hz, 3H). <sup>13</sup>C NMR (100 MHz, CDCl<sub>3</sub>) δ 188.9, 158.9, 144.2, 131.8, 130.7, 129.6, 128.6, 128.1, 127.7, 114.1, 113.7, 55.2, 31.6, 22.4, 13.9. HRMS (EI-TOF) calcd for C<sub>19</sub>H<sub>20</sub>O<sub>4</sub> (M<sup>+</sup>): 280.1463, found: 280.1469.

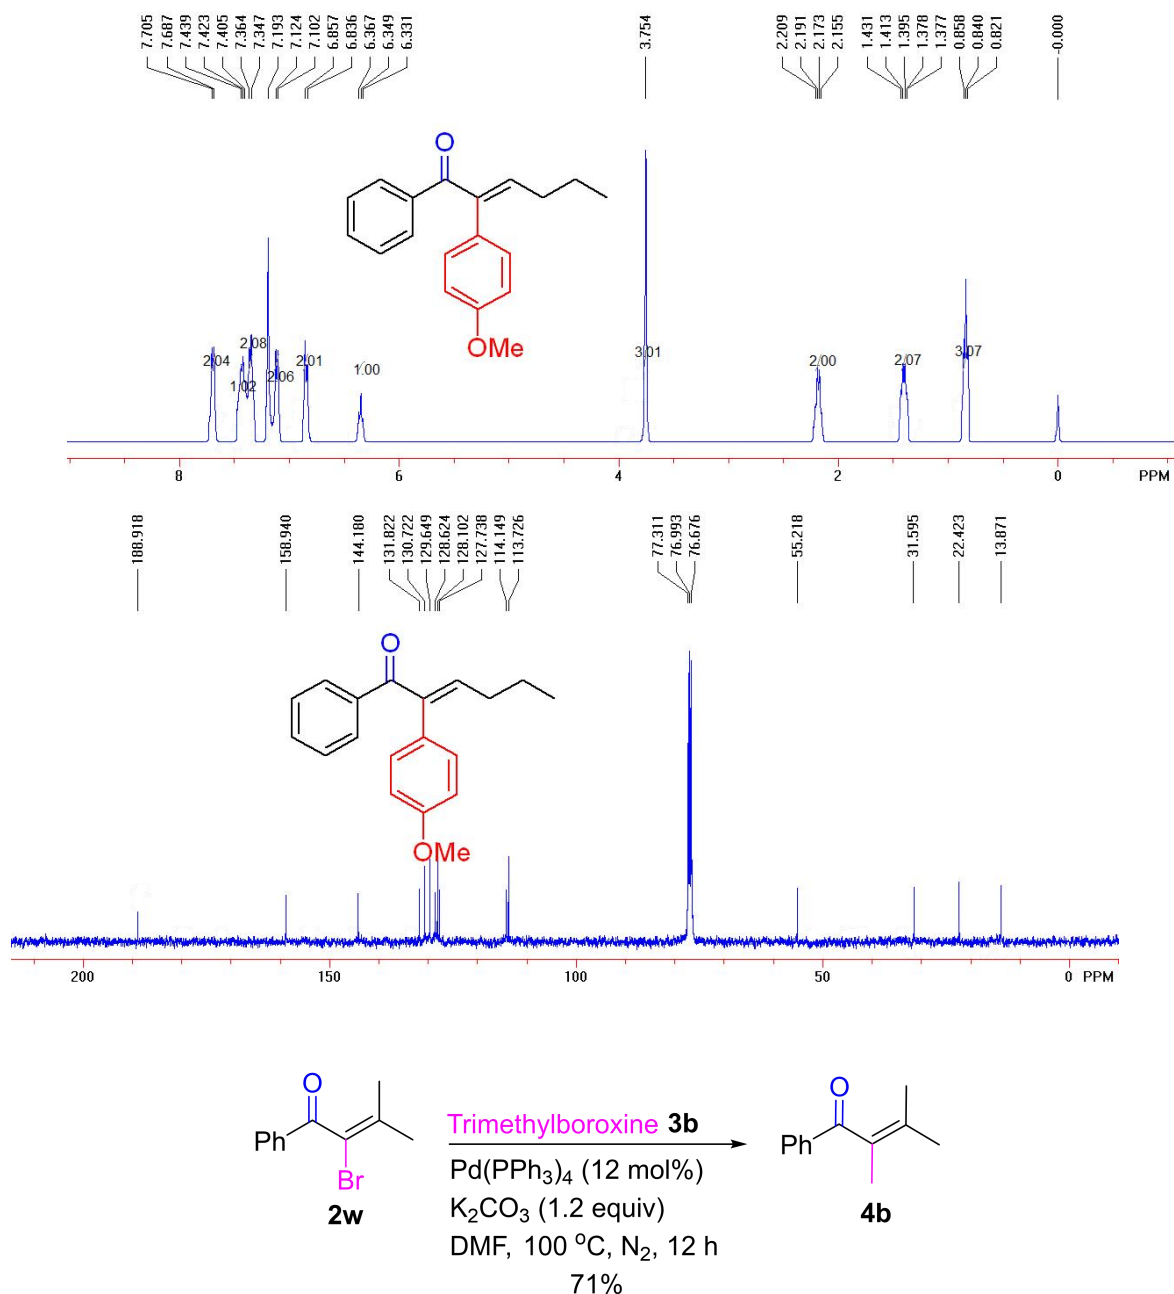

A mixture of 2-bromo-3-methyl-1-phenylbut-2-en-1-one **2w** (42.66 mg, 0.18 mmol, 1.0 equiv.), trimethylboroxine (27.6 mg, 0.22 mmol, 1.2 equiv.), Pd(PPh<sub>3</sub>)<sub>4</sub> (24.9 mg, 12 mol%), and K<sub>2</sub>CO<sub>3</sub> (74.6 mg, 0.54 mmol, 1.2 equiv.) in DMF (3.0 mL) was stirred at 100 °C under an argon atmosphere for 12 h in a sealed tube.<sup>2</sup> After the reaction mixture was cooled to room temperature, water was added and the mixture was extracted with EtOAc (3×10.0 mL). The combined organic phase was washed with water and brine, dried (Na<sub>2</sub>SO<sub>4</sub>), and concentrated. Evaporation of the solvent followed by purification on silica gel column, eluting with EtOAc/PE (1:10 ~ 1:5,

v/v), to give the product **2,3-dimethyl-1-phenylbut-2-en-1-one 4b** as a pale yellow oil (22.24 mg, 71%). <sup>1</sup>H NMR (400 MHz, CDCl<sub>3</sub>) δ 7.81 (d, *J* = 7.2 Hz, 2H), 7.49-7.44 (m, 1H), 7.40 (d, *J* = 6.8 Hz, 2H), 1.79 (d, *J* = 120.0 Hz, 6H), 1.54 (s, 3H). <sup>13</sup>C NMR (100 MHz, CDCl<sub>3</sub>) δ 190.9, 132.9, 129.8, 129.3, 128.6, 128.4, 128.2, 29.7, 22.4, 20.1. HRMS (EI-TOF) calcd for C<sub>12</sub>H<sub>14</sub>O (M<sup>+</sup>): 174.1045, found: 174.1048.

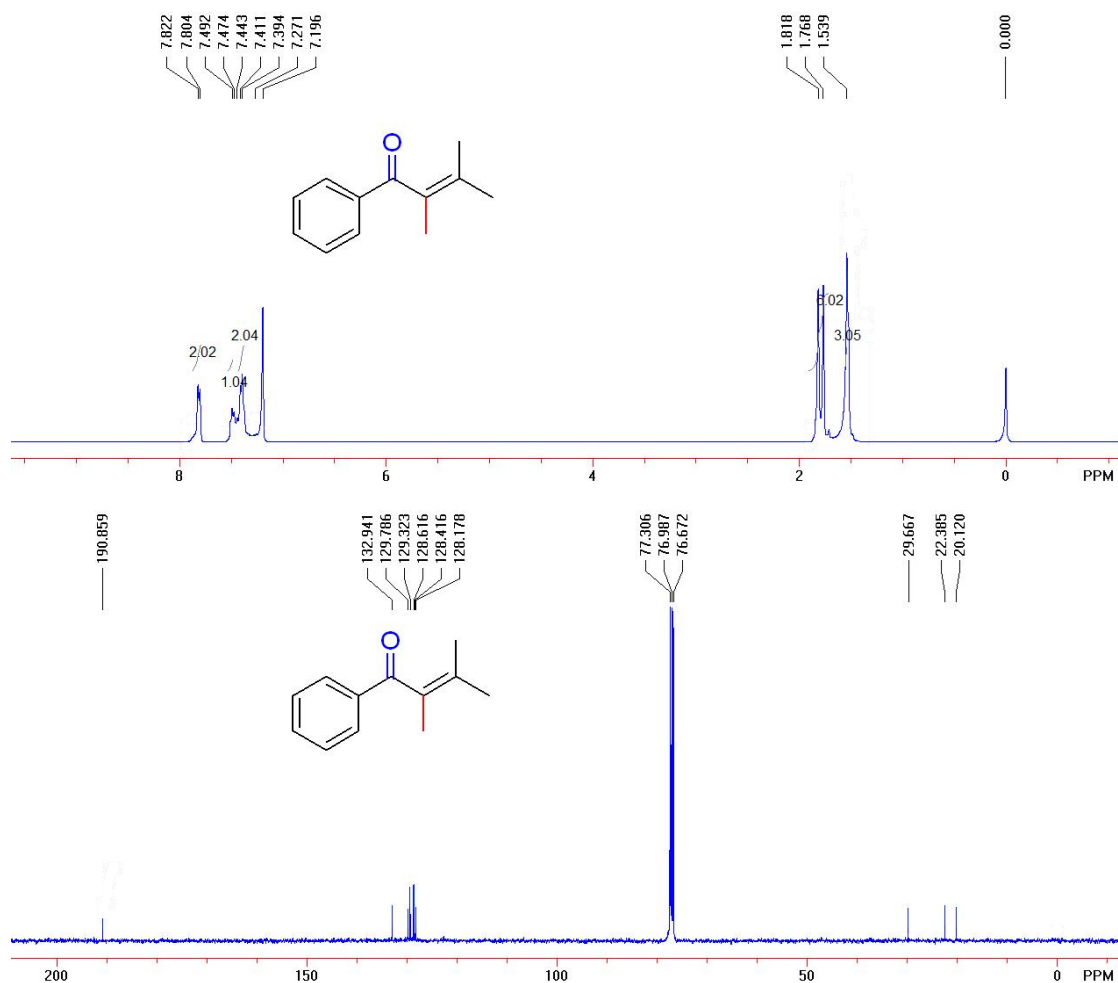

## Preliminary Mechanistic Investigations

### a) Radical trapping

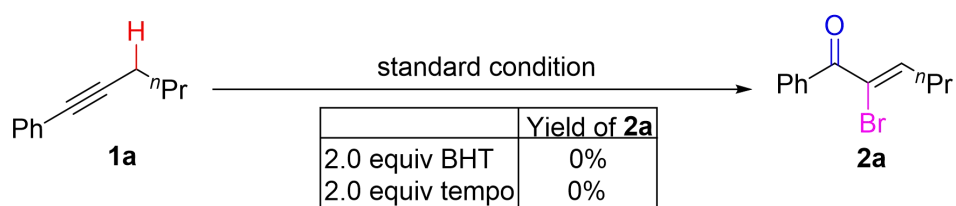

A 25 mL thick wall pressure sealed tube was charged with **1a** (0.1 mmol), FeBr<sub>3</sub> (4.4 mg, 0.015 mmol), **L2** (3.6 mg, 0.0125 mmol), ZnBr<sub>2</sub> (6.8 mg, 0.03 mmol), TFA (45.8 mg, 0.4 mmol), radical scavenger (0.2 mmol), and PhCF<sub>3</sub> (1.0 mL) with 40 W blue LED irradiation under air at room temperature for 12 h. The mixture was then cooled to room temperature, diluted with EtOAc. The product **2a** was not observed through TLC. The crude reaction mixture was analyzed by <sup>1</sup>H NMR after filtered through a celite pad, washed with water three times, and concentrated in vacuo.

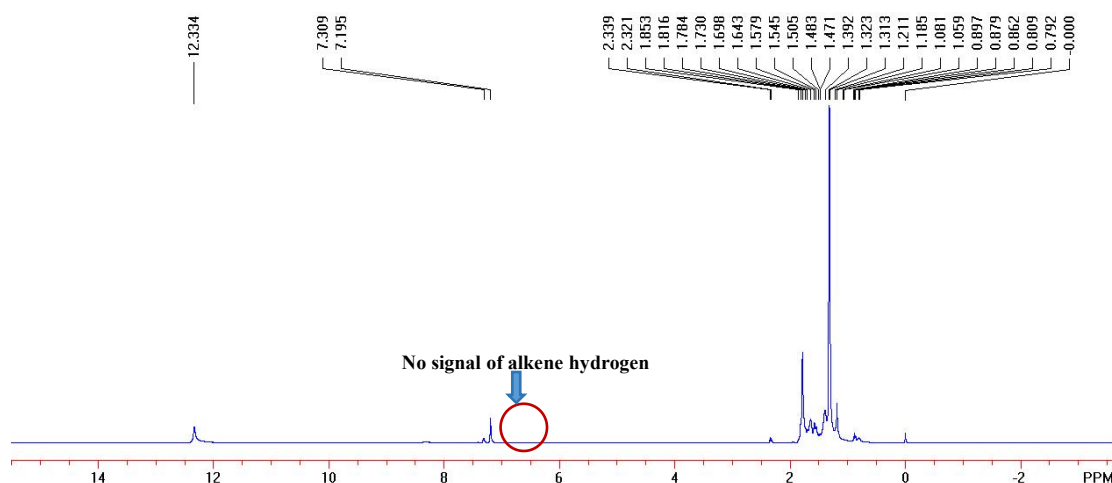

**b) Intermolecular kinetic isotopic effects**

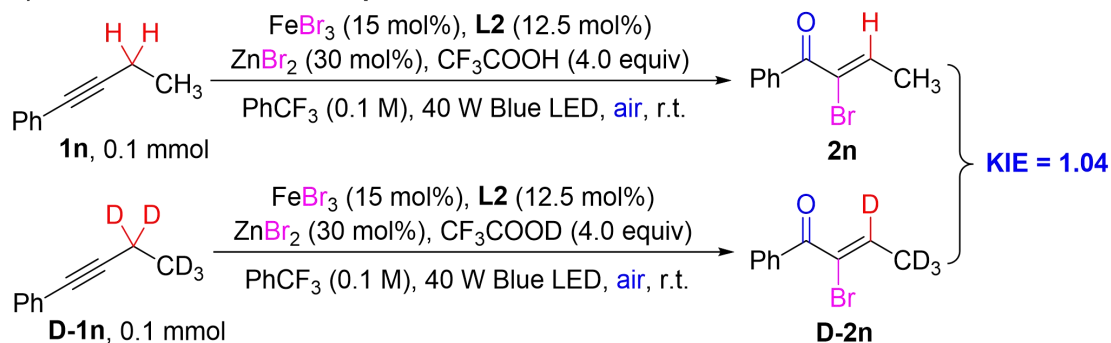

A 25 mL thick wall pressure sealed tube was charged with **1n** or **D-1n** (0.1 mmol), FeBr<sub>3</sub> (4.4 mg, 0.015 mmol), **L2** (3.6 mg, 0.0125 mmol), ZnBr<sub>2</sub> (6.8 mg, 0.03 mmol), CF<sub>3</sub>COOH or CF<sub>3</sub>COOD (45.8 mg, 0.4 mmol), and PhCF<sub>3</sub> (1.0 mL) with 40 W blue LED irradiation under air at room temperature for 1.0-3.0 h. The mixture was then cooled to room temperature, diluted with EtOAc, filtered through a celite pad, and concentrated in vacuo. The yield of **2n** or **D-2n** was determined on the basis of <sup>1</sup>H

NMR analysis which using dichloromethane (7.0  $\mu\text{L}$ ) as the internal standard.

| entry                 | 1     | 2     | 3     | 4     | 5     |
|-----------------------|-------|-------|-------|-------|-------|
| time/min              | 60    | 90    | 120   | 150   | 180   |
| Yield <b>3n</b> (%)   | 12.08 | 18.75 | 23.56 | 29.21 | 36.59 |
| Yield <b>D-3n</b> (%) | 7.56  | 12.69 | 18.51 | 25.35 | 29.78 |

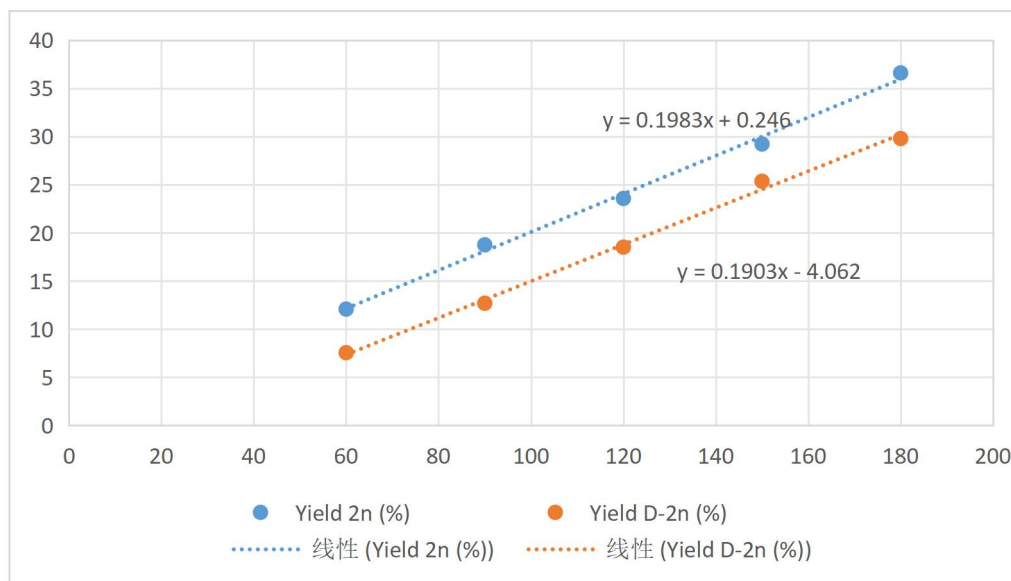

The calculated  $k_{\text{H}}/k_{\text{D}} = 0.1983/0.1903 = 1.04$ .

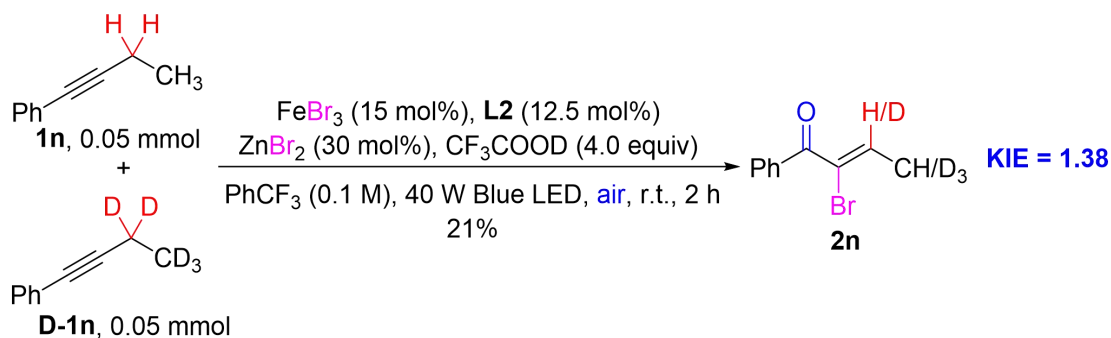

A 25 mL thick wall pressure sealed tube was charged with **1n** (0.05 mmol), **D-1n** (0.05 mmol),  $\text{FeBr}_3$  (4.4 mg, 0.015 mmol), **L2** (3.6 mg, 0.0125 mmol),  $\text{ZnBr}_2$  (6.8 mg, 0.03 mmol),  $\text{CF}_3\text{COOD}$  (45.8 mg, 0.4 mmol), and  $\text{PhCF}_3$  (1.0 mL) with 40 W blue LED irradiation under air at room temperature for 2 h. The mixture was then cooled to room temperature, diluted with EtOAc, filtered through a celite pad, and concentrated

in vacuo. The residue was purified by flash column chromatography on silica gel, eluting with EtOAc/PE (1:40 ~ 1:30, v/v), to give the corresponding product **2n** (23%).

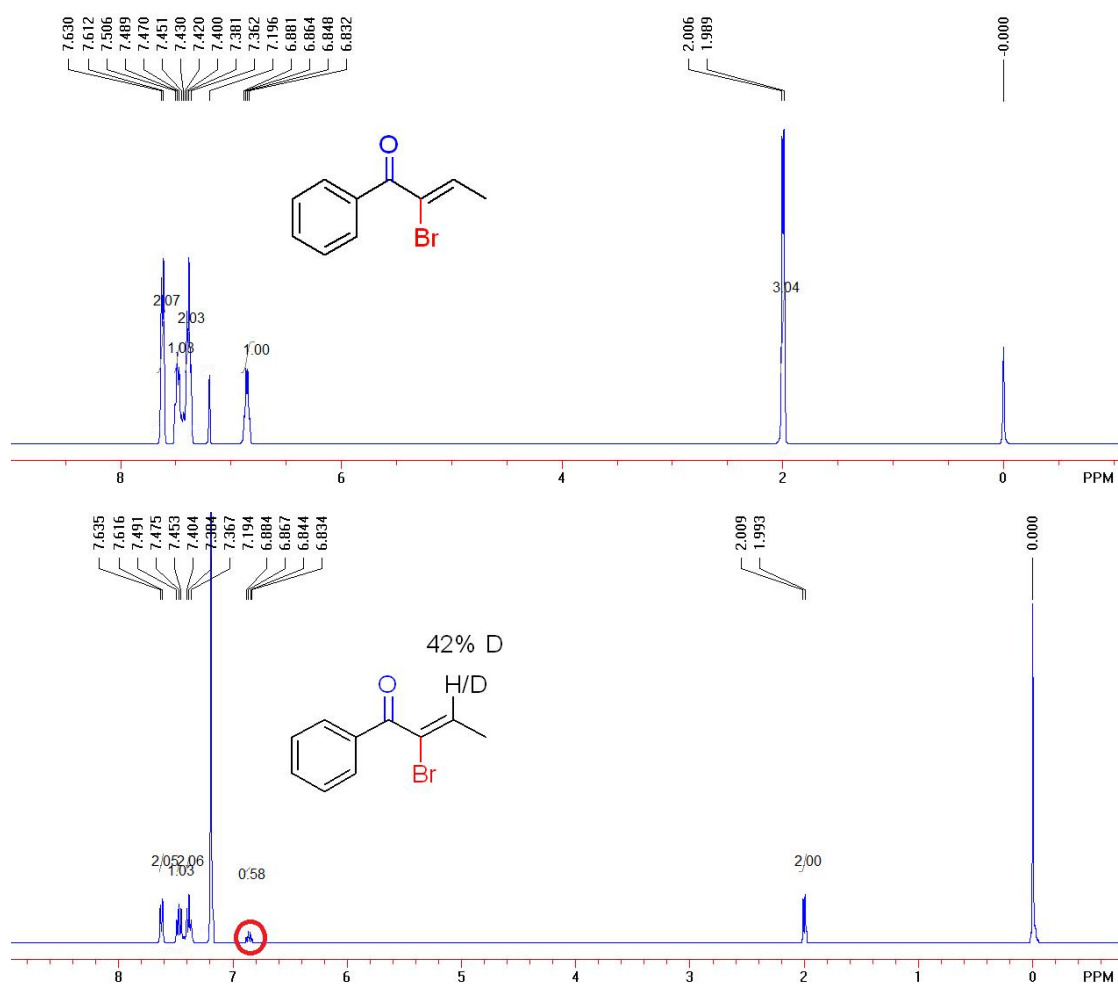

### c) Light on/off experiments

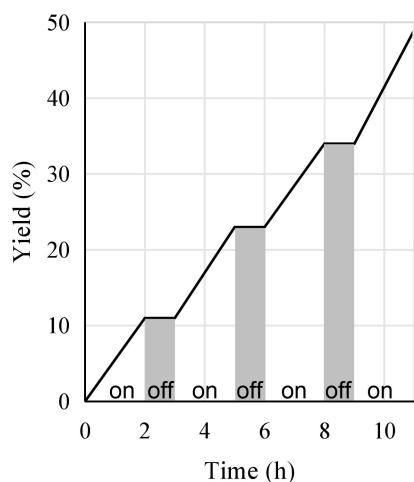

A 25 mL thick wall pressure sealed tube was charged with **1a** (15.8 mg, 1.0 mmol), FeBr<sub>3</sub> (44 mg, 0.15 mmol), **L2** (36 mg, 0.125 mmol), ZnBr<sub>2</sub> (68 mg, 0.3 mmol), TFA (458 mg, 0.4 mmol), and PhCF<sub>3</sub> (10 mL) with 40 W blue LED irradiation under air at room temperature for 12 h. After degassing, the reaction mixture was alternately exposed to light and dark conditions, with the irradiation status switched every 3 h to monitor potential photochemical effects. Aliquots (400 μL) were periodically withdrawn from the reaction mixture for quantitative analysis. Upon completion of irradiation, the yield of product **2a** was determined by <sup>1</sup>H NMR spectroscopy using dibromomethane (7.0 μL) as an internal standard.

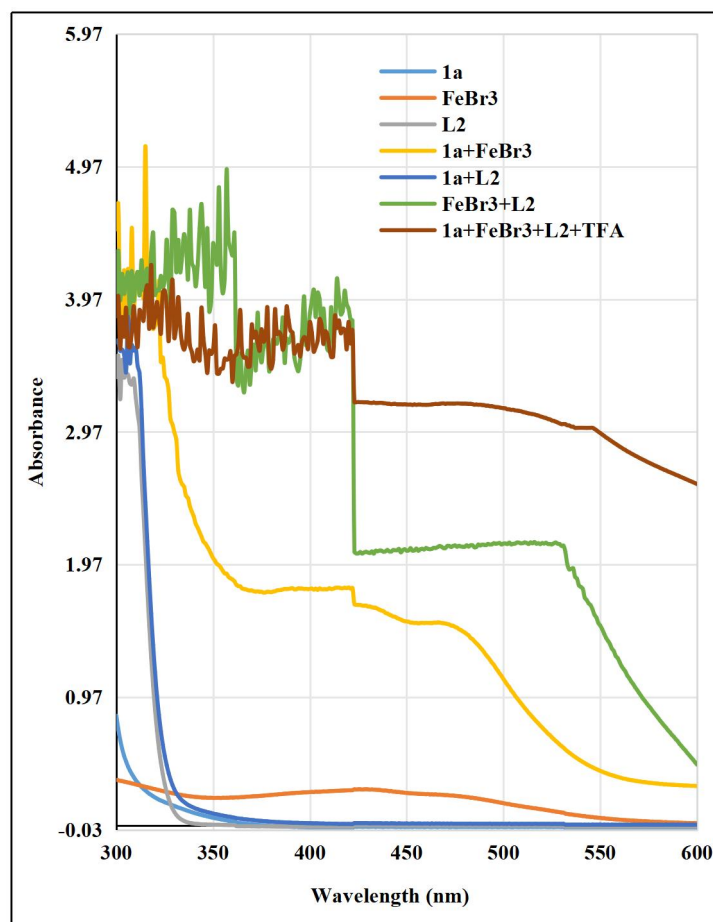

Ultraviolet-visible (UV-Vis) spectroscopy was performed on individual reaction components and their combinations using a Dual-beam ultraviolet-visible spectrometer UV-VIS (Beijing Pulse, China). The ultraviolet-visible absorption spectra were measured immediately after the preparation of the solutions. The sample for UV-Vis spectroscopic analysis was prepared at concentrations optimized under specific reaction conditions and then diluted 100-fold to acquire the UV-Vis spectrum.

**UV-Vis spectrum for the solvents of different combinations with iron salts:**

A: **1a** (15.8 mg, 0.1 mmol) was dissolved in PhCF<sub>3</sub> (100 mL), stirred for 10 min; B: FeBr<sub>3</sub> (4.4 mg, 0.015 mmol) was dissolved in PhCF<sub>3</sub> (100 mL), stirred for 10 min; C: **L2** (3.6 mg, 0.0125 mmol) was dissolved in PhCF<sub>3</sub> (100 mL), stirred for 10 min; D: **1a** (15.8 mg, 0.1 mmol) and FeBr<sub>3</sub> (4.4 mg, 0.015 mmol) were dissolved in PhCF<sub>3</sub> (100 mL), stirred for 10 min; E: **1a** (15.8 mg, 0.1 mmol) and **L2** (3.6 mg, 0.0125 mmol) were dissolved in PhCF<sub>3</sub> (100 mL), stirred for 10 min; F: FeBr<sub>3</sub> (4.4 mg, 0.015

mmol) and **L2** (3.6 mg, 0.0125 mmol) were dissolved in PhCF<sub>3</sub> (100 mL), F: **1a** (15.8 mg, 0.1 mmol), FeBr<sub>3</sub> (4.4 mg, 0.015 mmol), **L2** (3.6 mg, 0.0125 mmol) and TFA (458 mg, 0.4 mmol) were dissolved in PhCF<sub>3</sub> (100 mL), stirred for 10 min; each time, 3 mL of the prepared solvent was moved to the cuvette for the measurement.

## References

(1) B. M. Trost and J. S. Tracy, Vanadium-Catalyzed Synthesis of Geometrically Defined Acyclic Triand Tetrasubstituted Olefins from Propargyl Alcohols, *ACS Catal.*, 2019, **9**, 1584–1594.

(2) F. Wan, N. Wang, Y. Zhu, C. Tang, J. Claveria and W. Tang, Enantioselective hydrogenation of cyclic tetrasubstituted-olefinic dehydroamino acid derivatives, *Chem. Commun.*, 2021, **57**, 5546-5549.

# Copies of $^1\text{H}$ and $^{13}\text{C}$ NMR Spectra

## (Z)-2-bromo-1-phenylhex-2-en-1-one (2a)

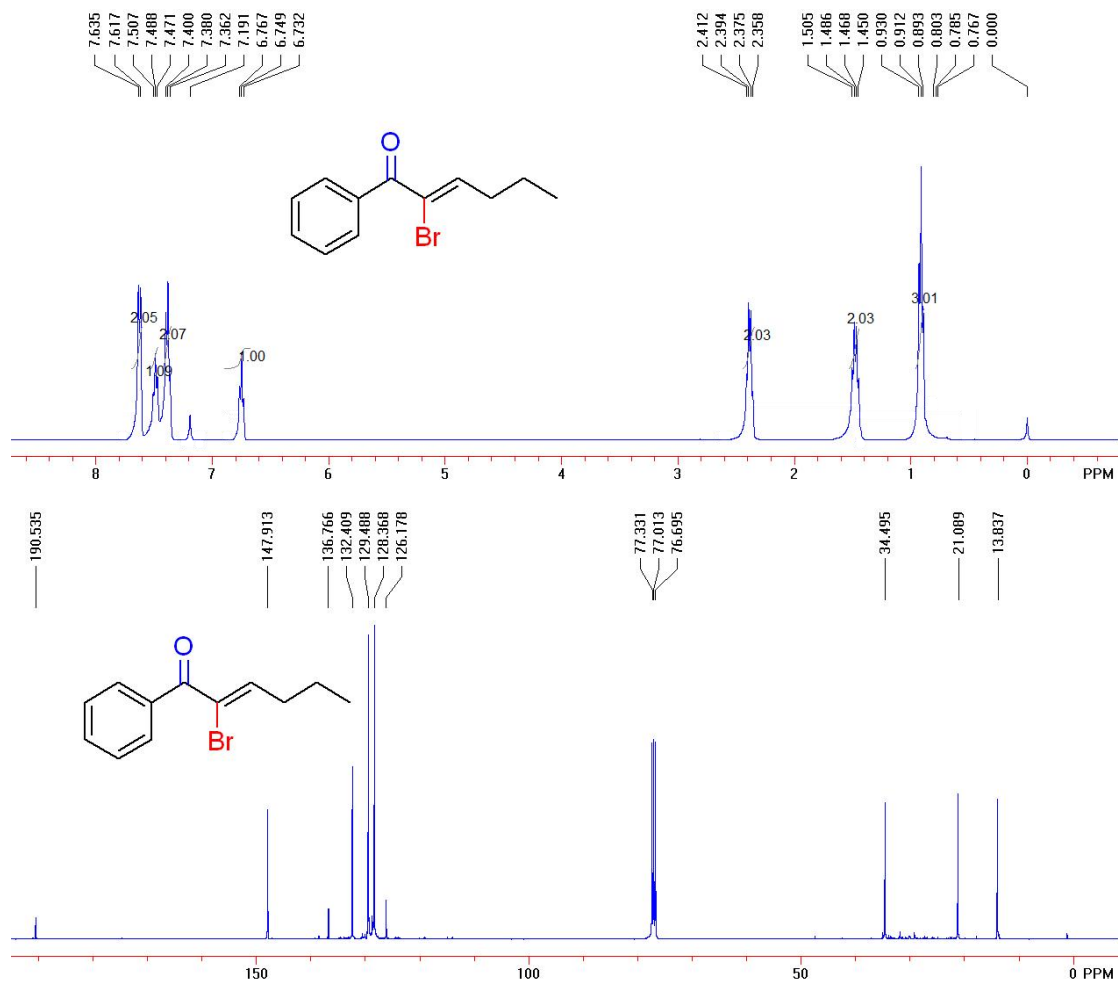

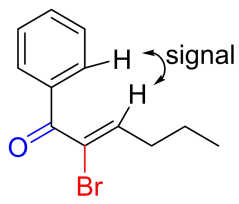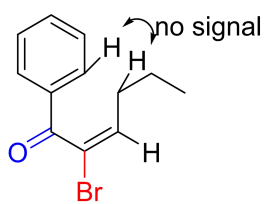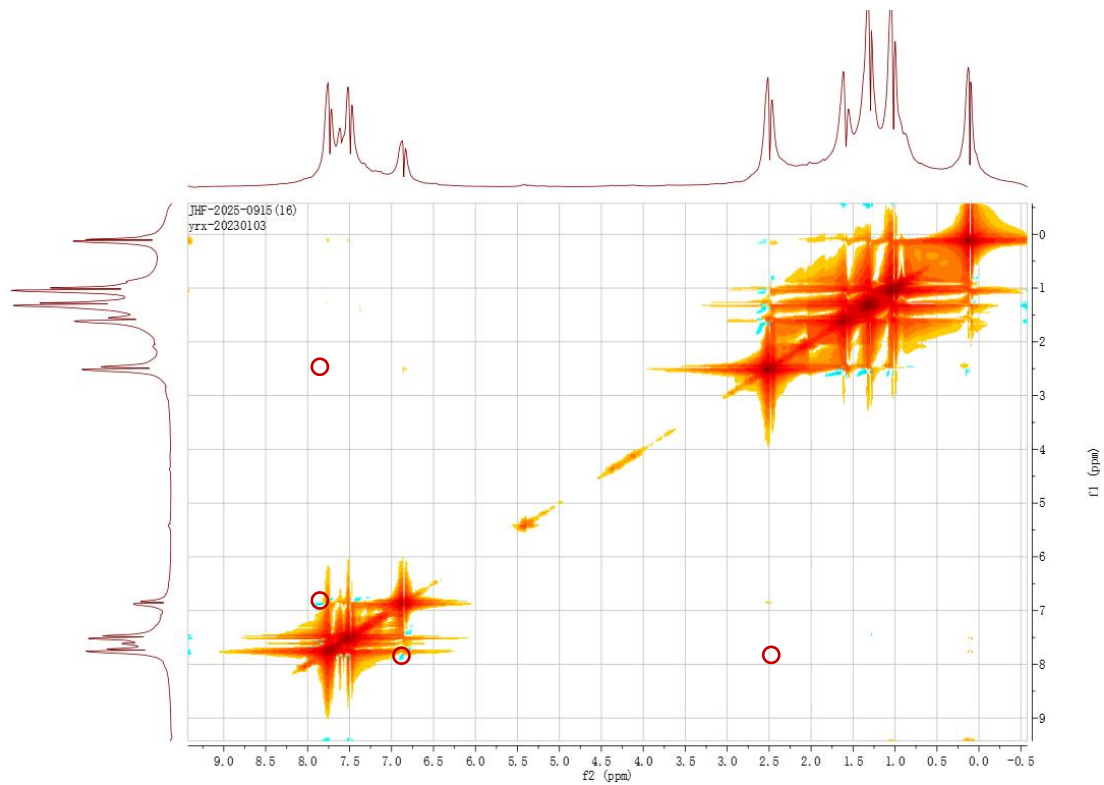

## 2-(Z)-2-bromo-1-(3,4-dimethoxyphenyl)hex-2-en-1-one (2b)

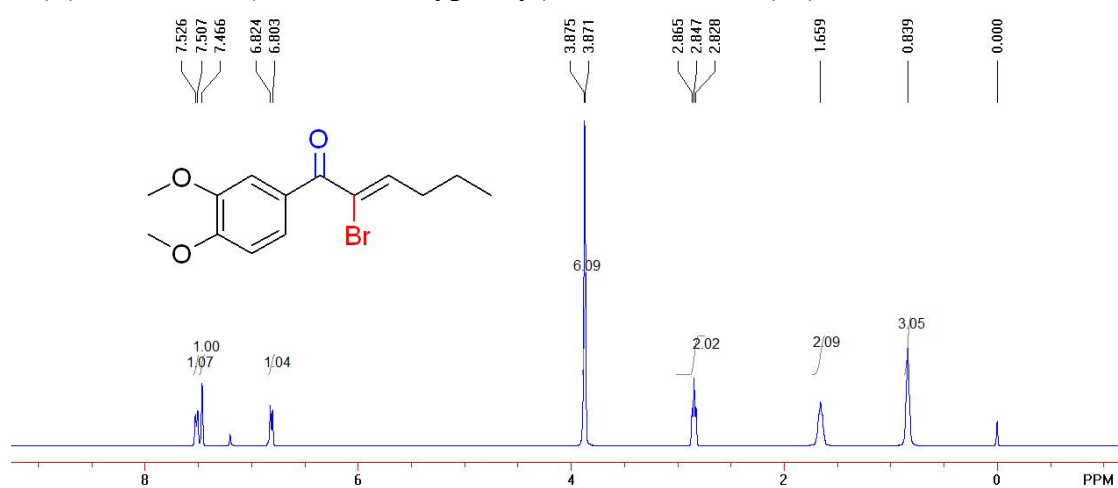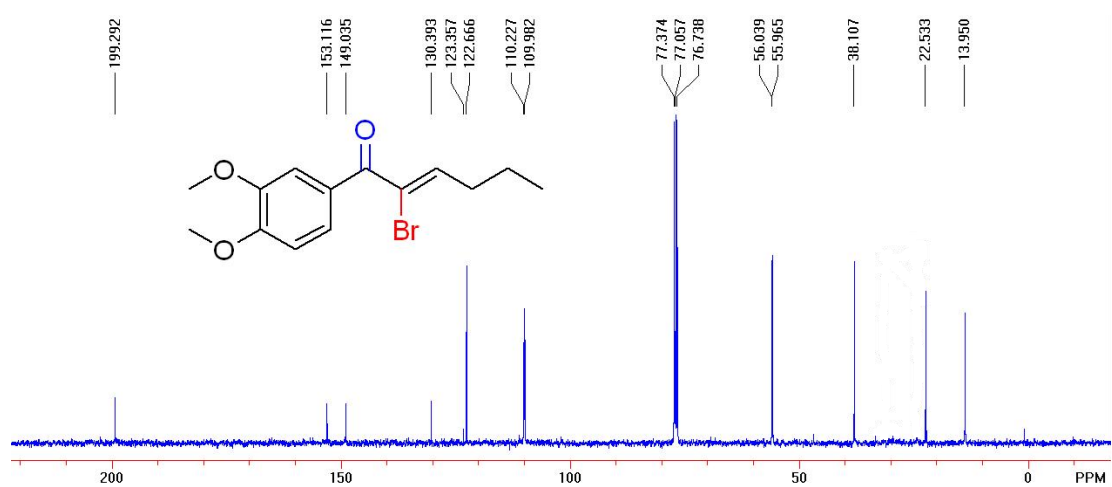

**(Z)-1-([1,1'-biphenyl]-4-yl)-2-bromohex-2-en-1-one (2c)**

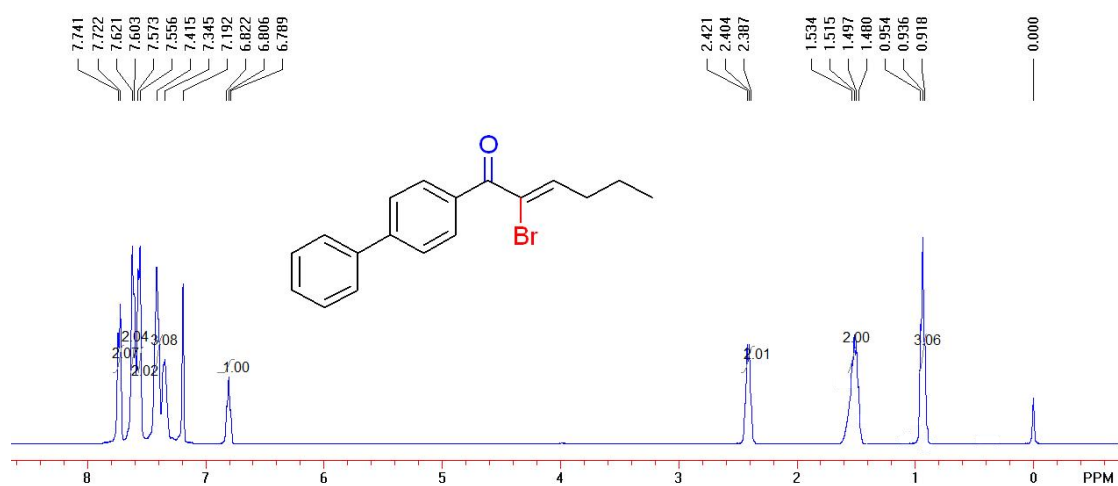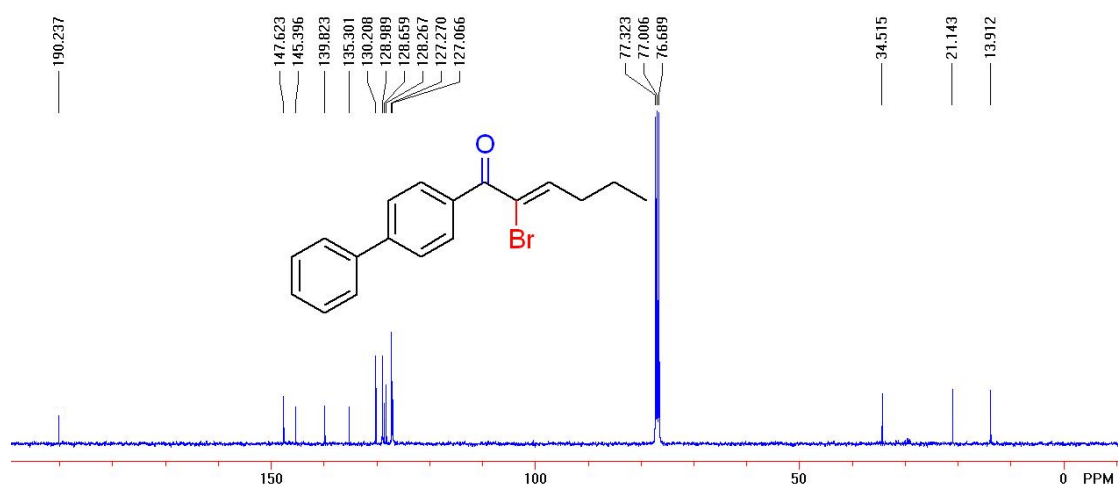

**(Z)-2-bromo-1-(4-isopropylphenyl)hex-2-en-1-one (2d)**

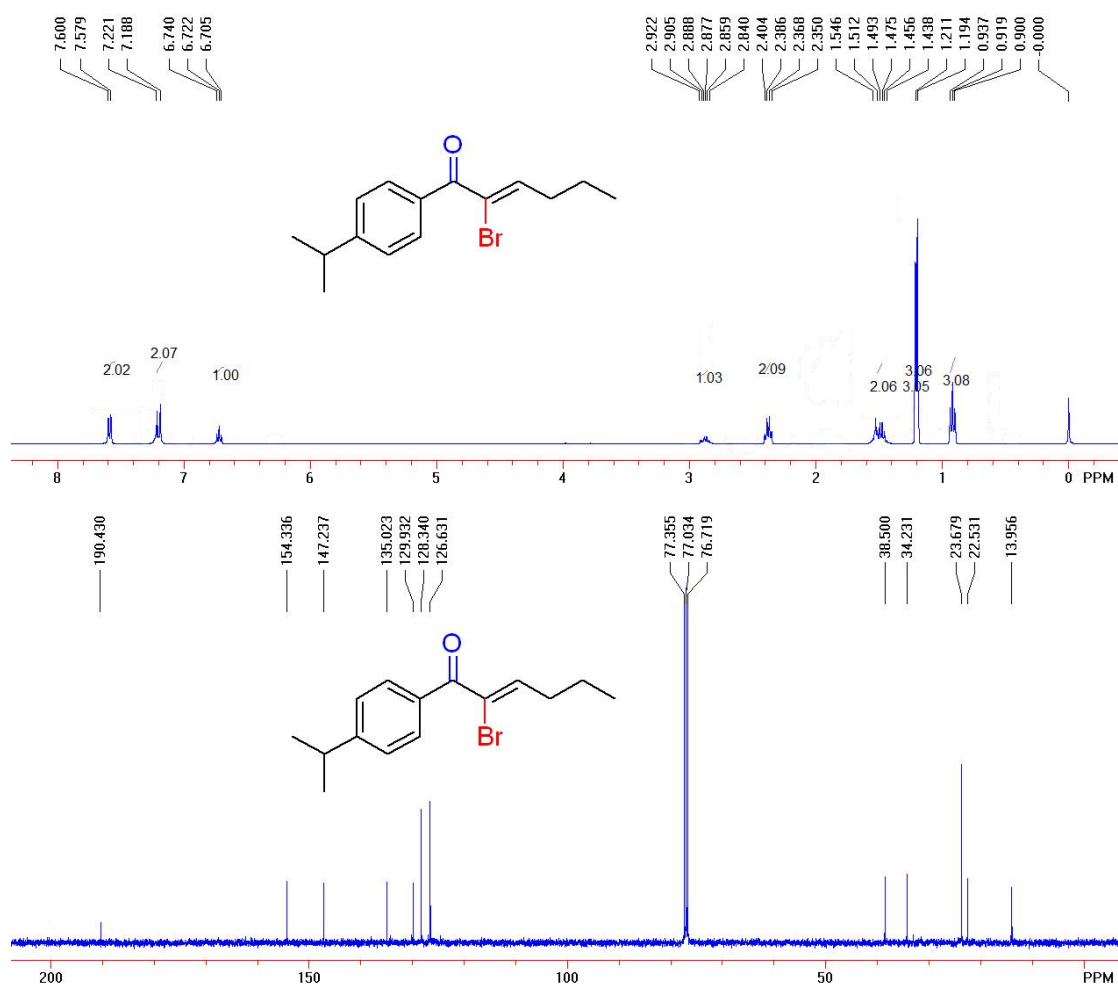

**(Z)-2-bromo-1-(4-(tert-butyl)phenyl)hex-2-en-1-one (2e)**

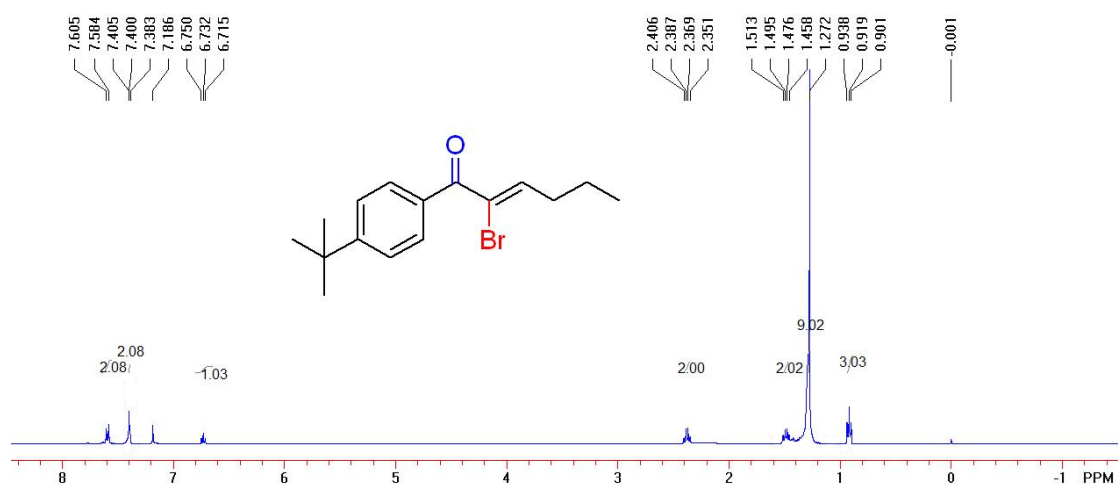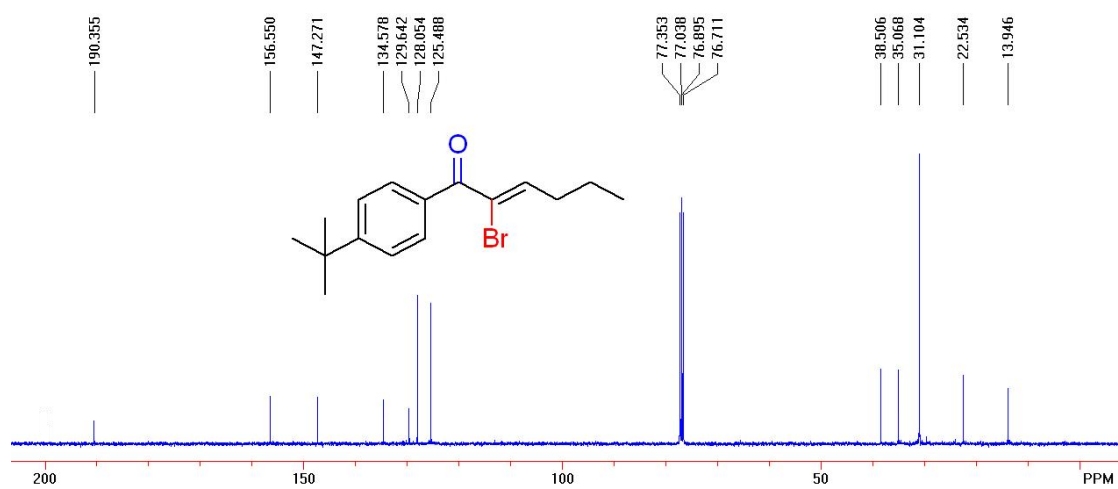

**(Z)-2-bromo-1-(p-tolyl)hex-2-en-1-one (2f)**

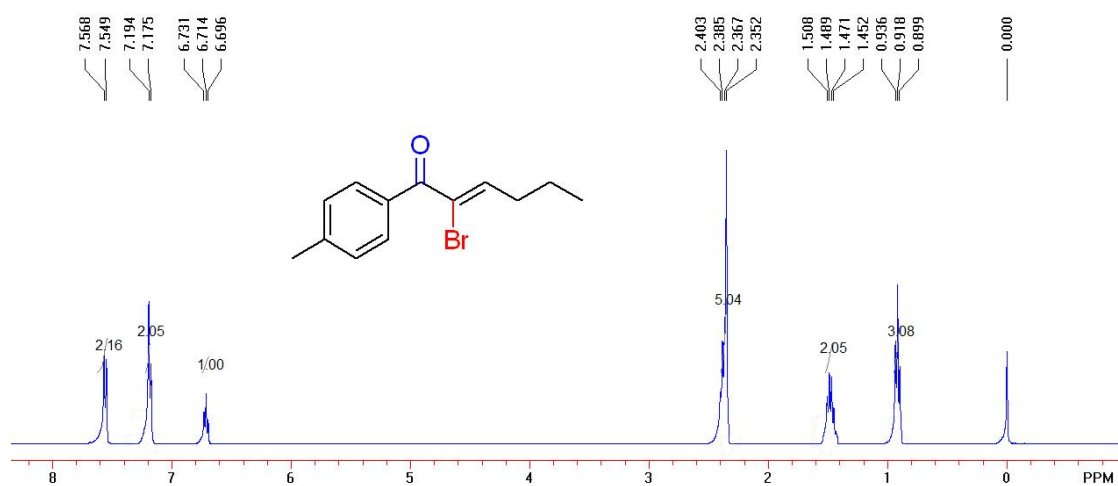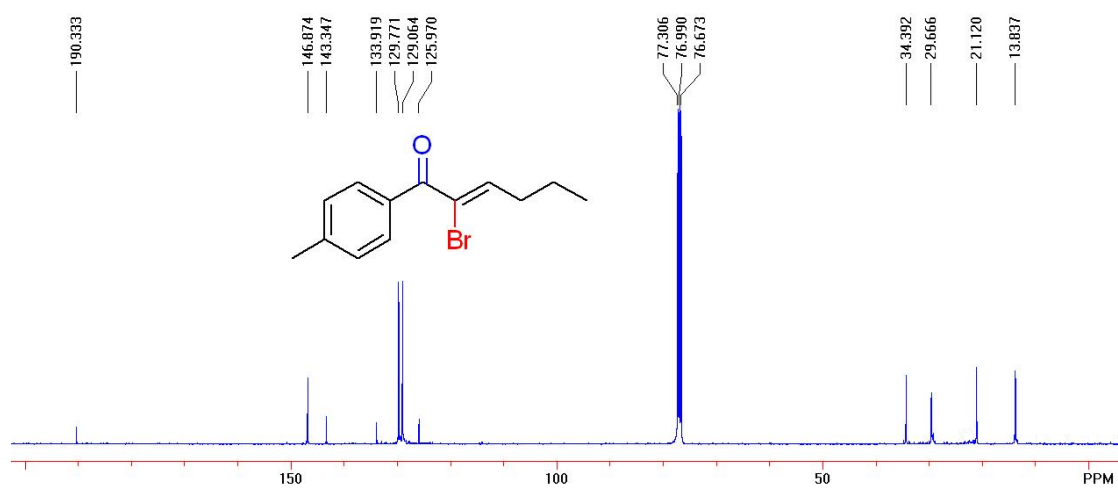

**(Z)-2-bromo-1-(m-tolyl)hex-2-en-1-one (2g)**

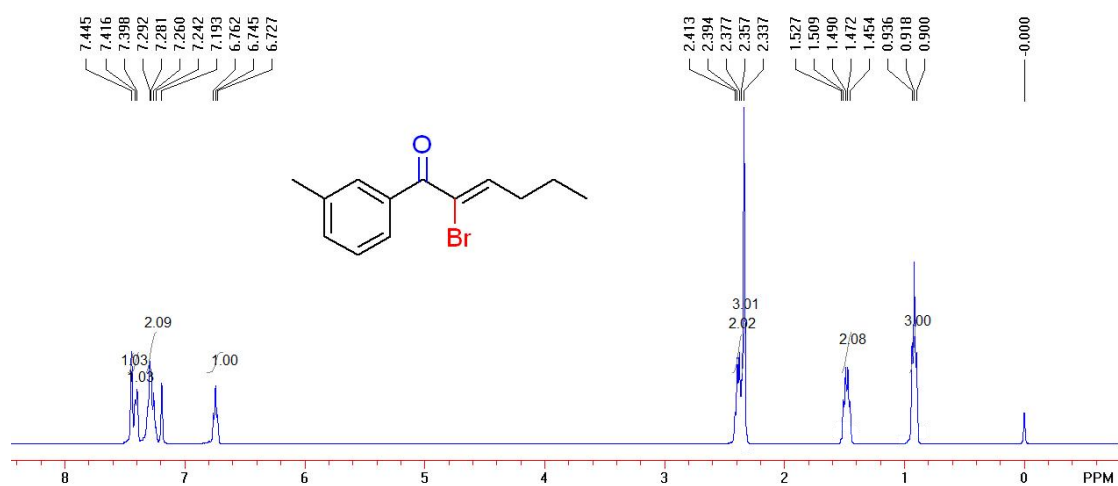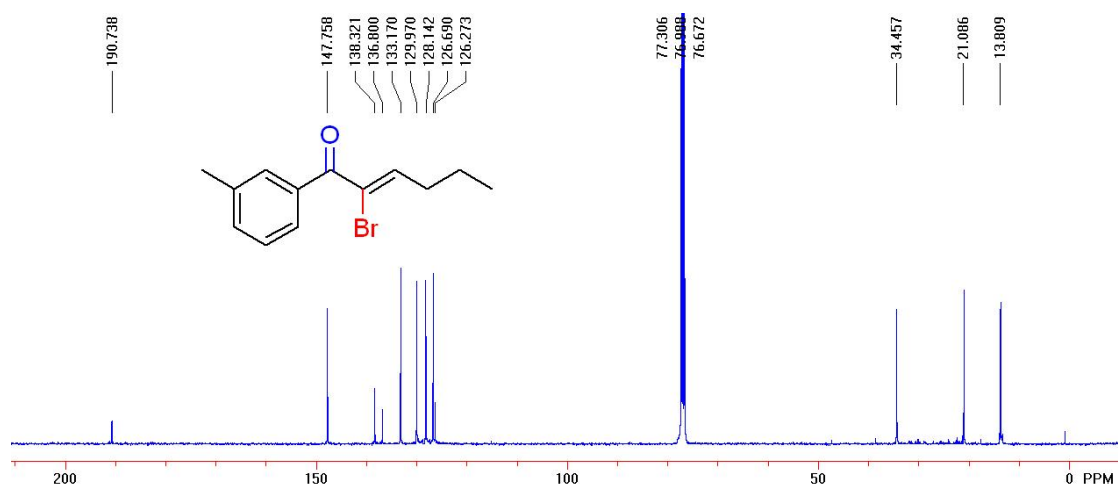

# 6-(4-chlorophenyl)-3-morpholino-*N*-(quinolin-8-yl)hex-5-ynamide (2h)

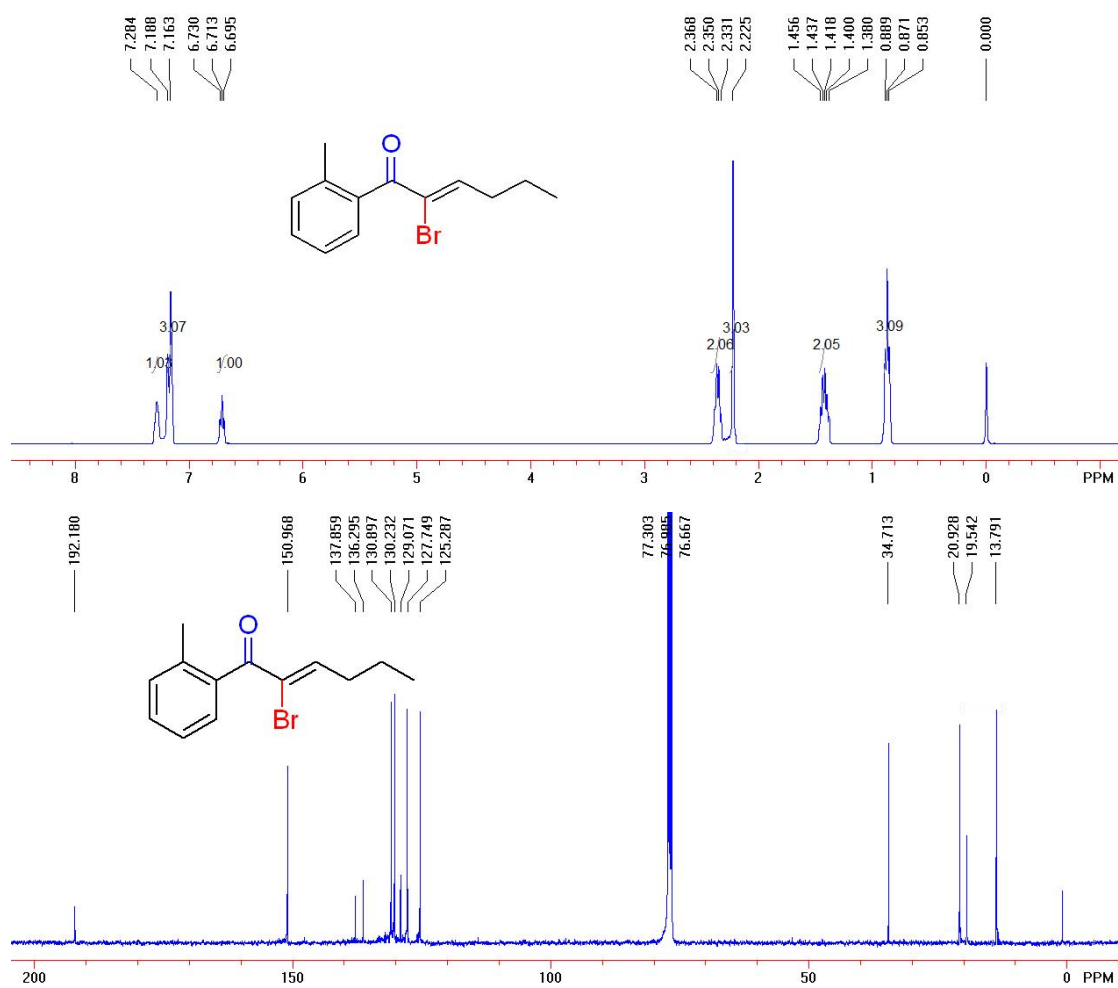

**(Z)-2-bromo-1-(4-bromophenyl)hex-2-en-1-one (2i)**

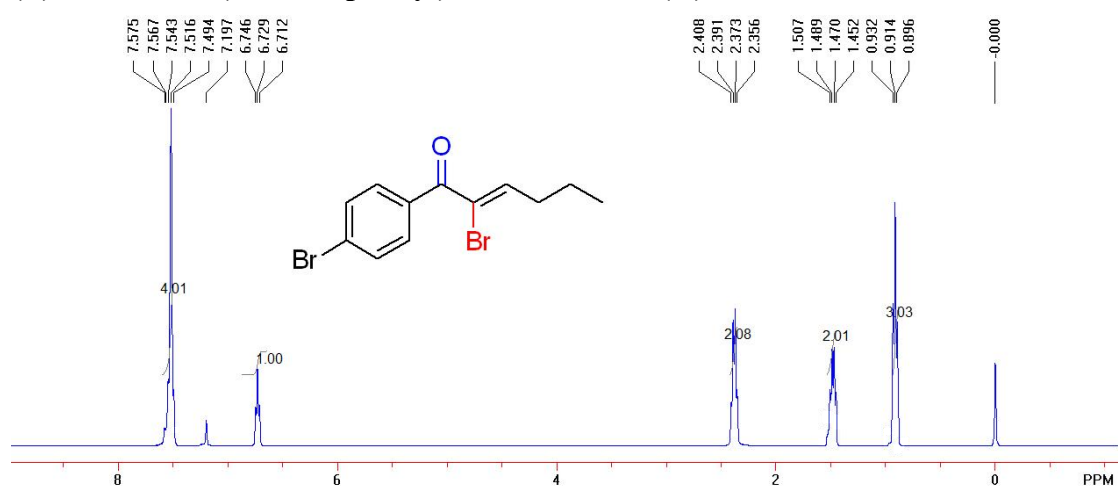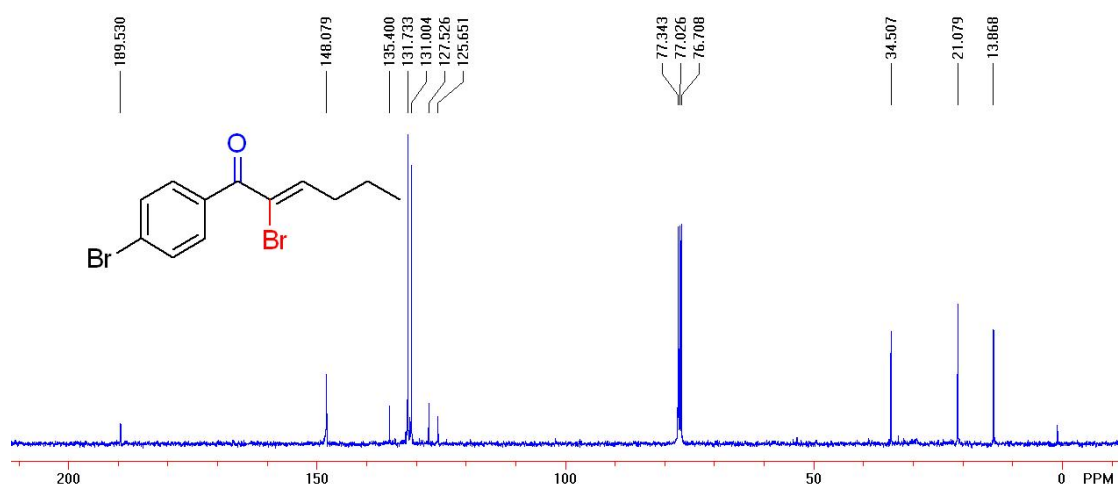

**(Z)-2-bromo-1-(2-bromophenyl)hex-2-en-1-one (2j)**

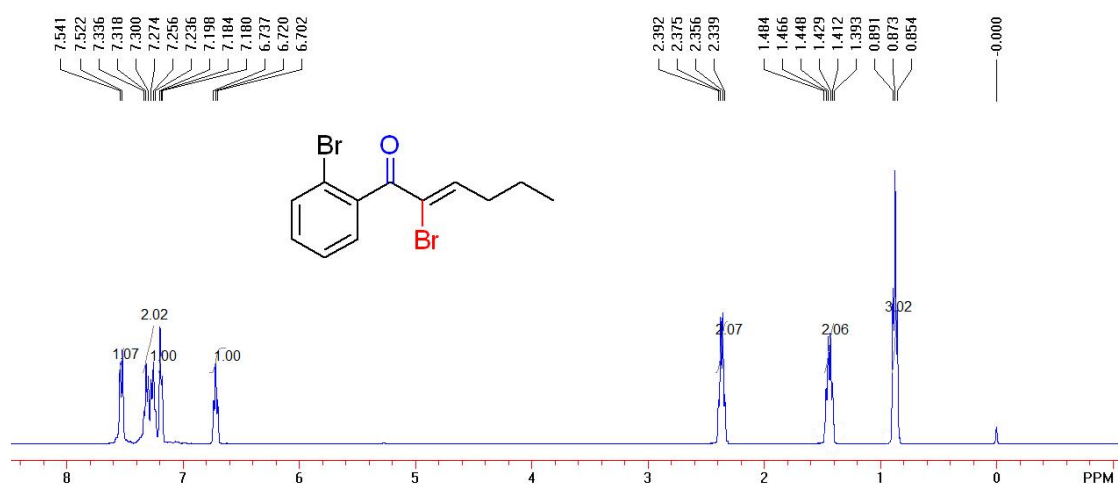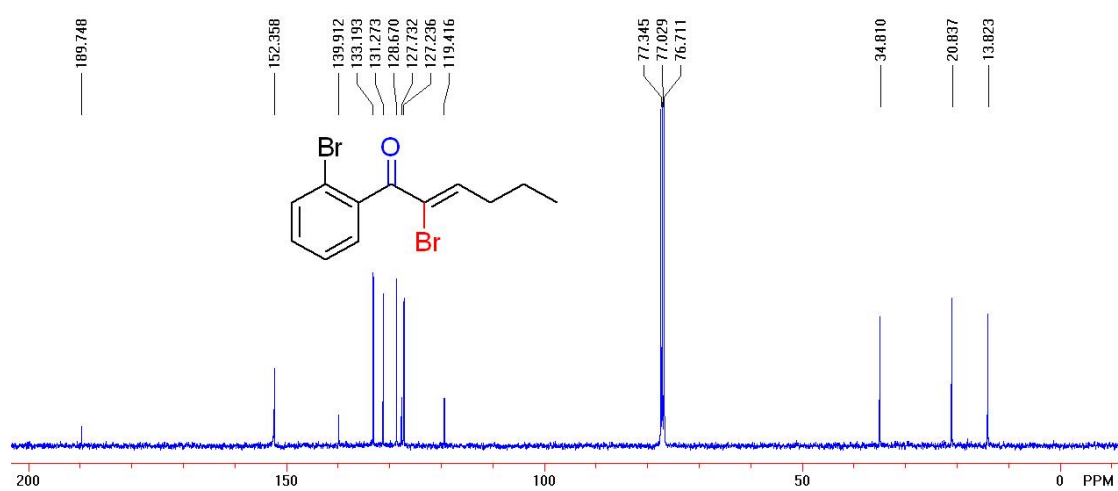

**(Z)-2-bromo-1-(4-chlorophenyl)hex-2-en-1-one (2k)**

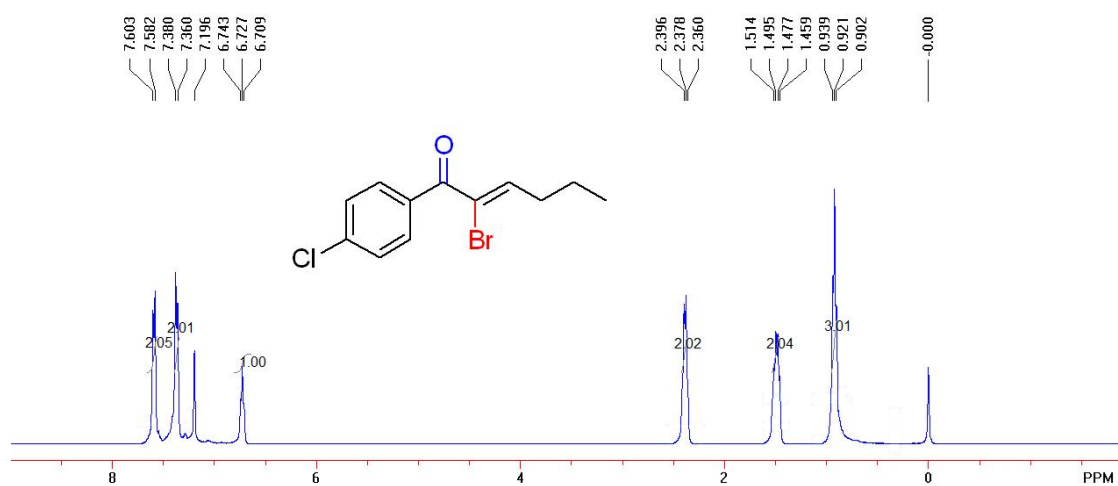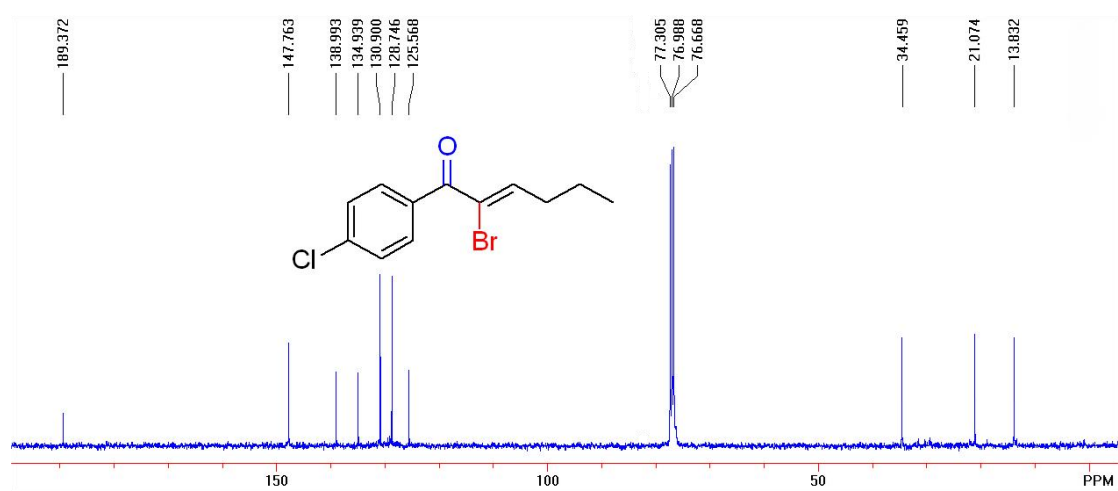

**(Z)-2-bromo-1-(4-fluorophenyl)hex-2-en-1-one (2l)**

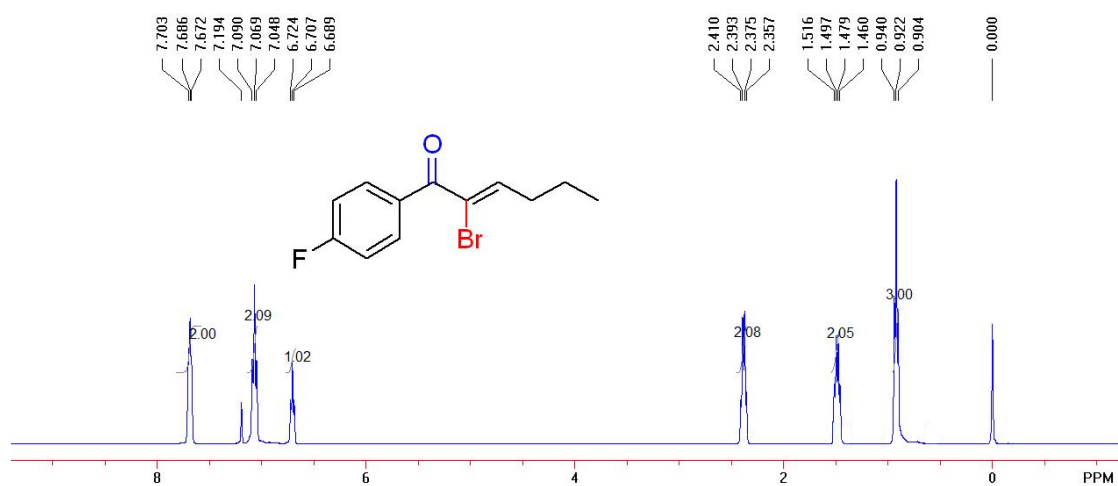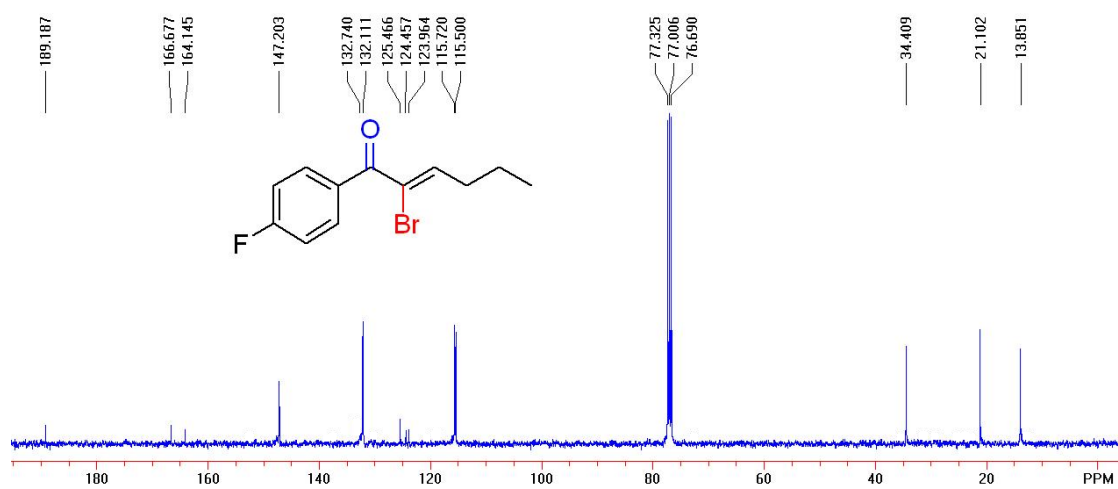

**(Z)-2-bromo-1-(4-nitrophenyl)hex-2-en-1-one (2m)**

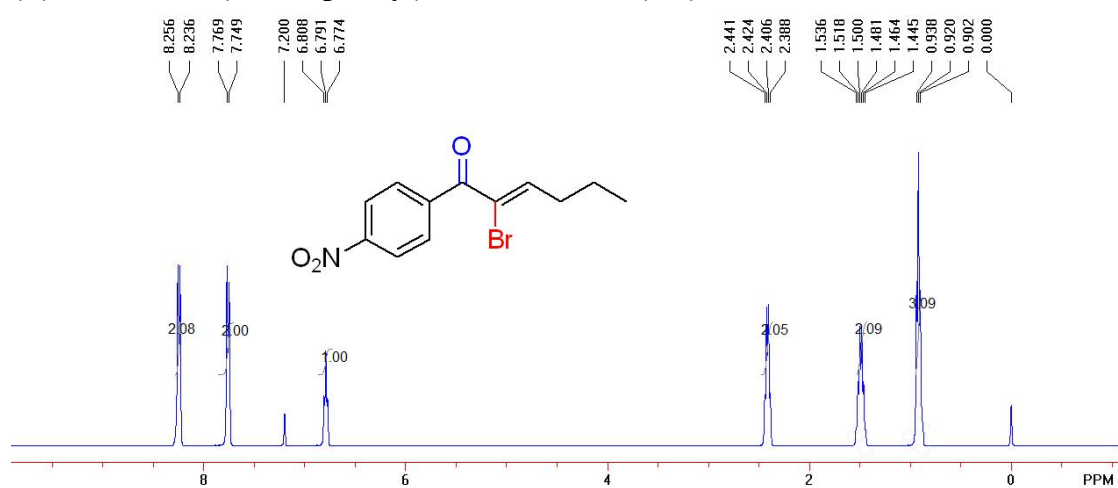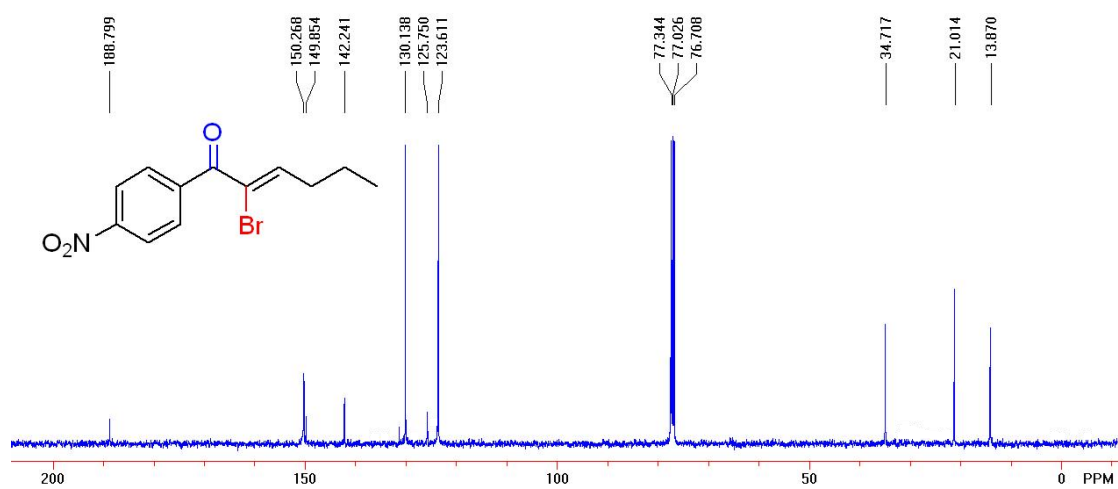

**(Z)-1-(4-acetylphenyl)-2-bromohex-2-en-1-one (2n)**

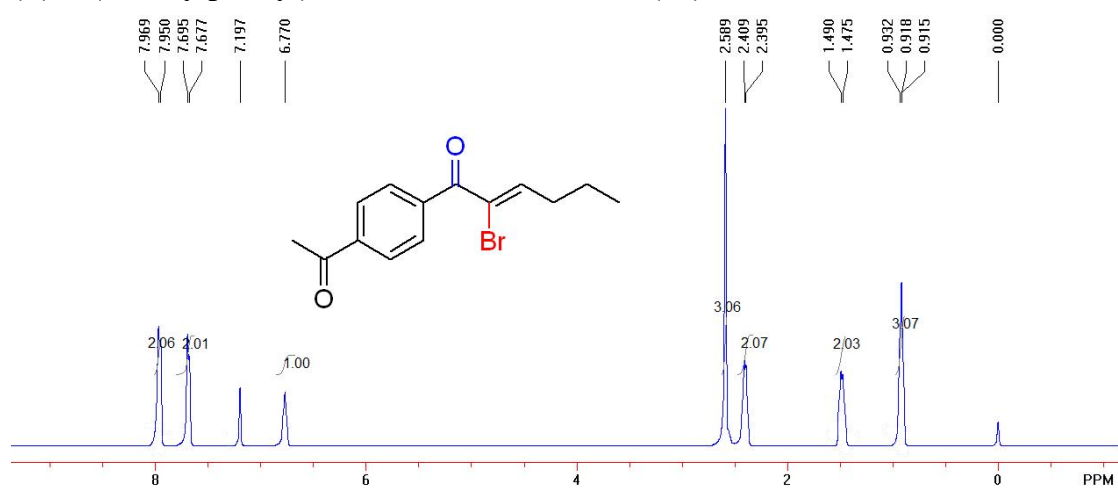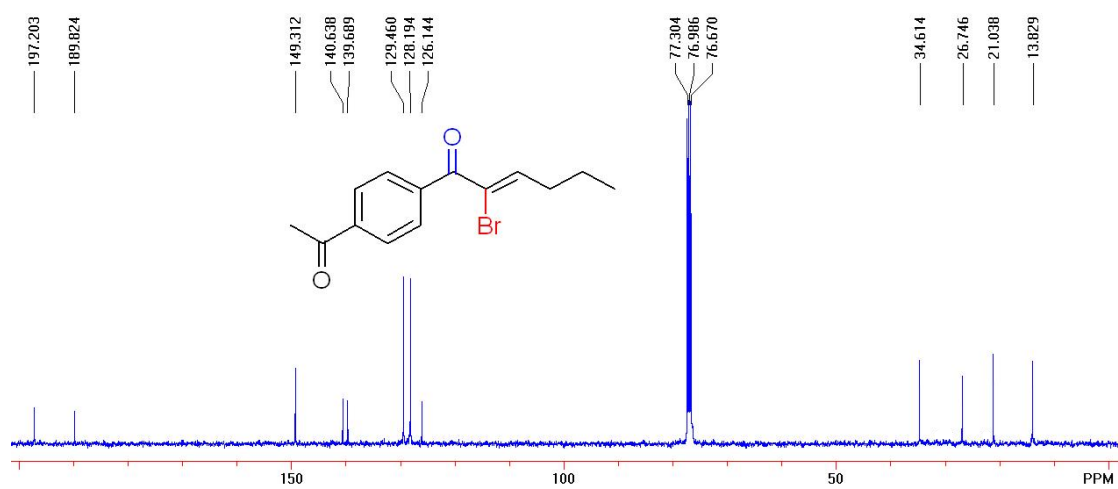

**(Z)-2-bromo-1-(naphthalen-1-yl)hex-2-en-1-one (2o)**

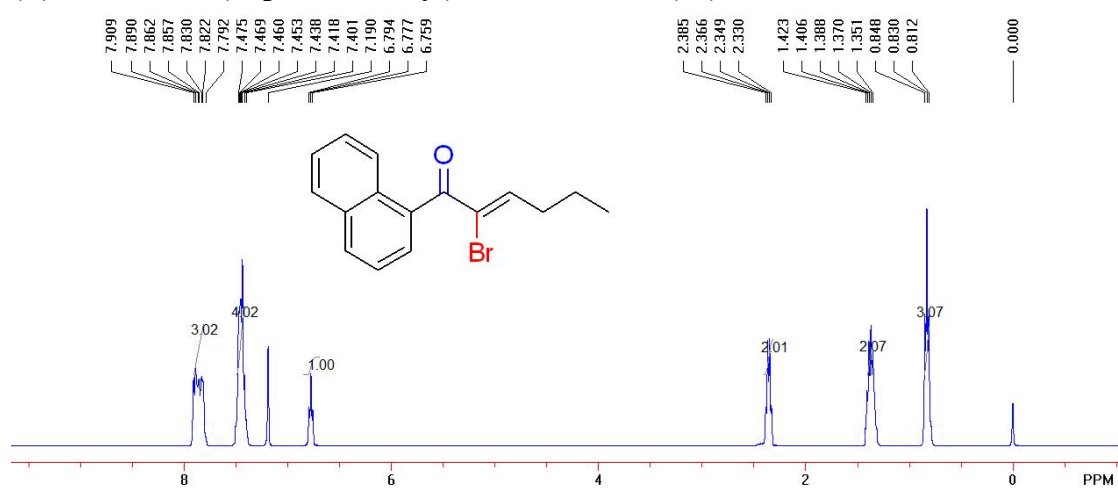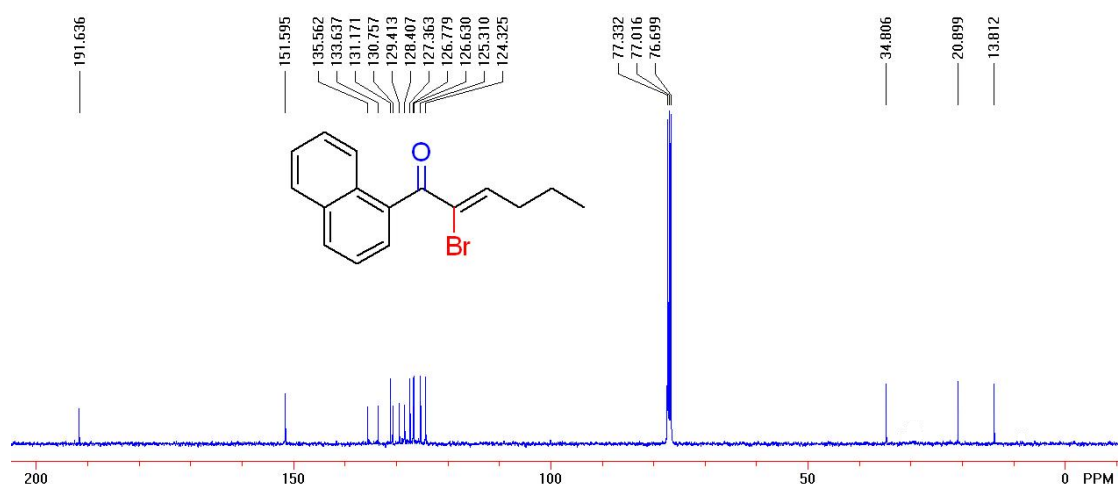

**(Z)-2-bromo-1-(thiophen-2-yl)hex-2-en-1-one (2p)**

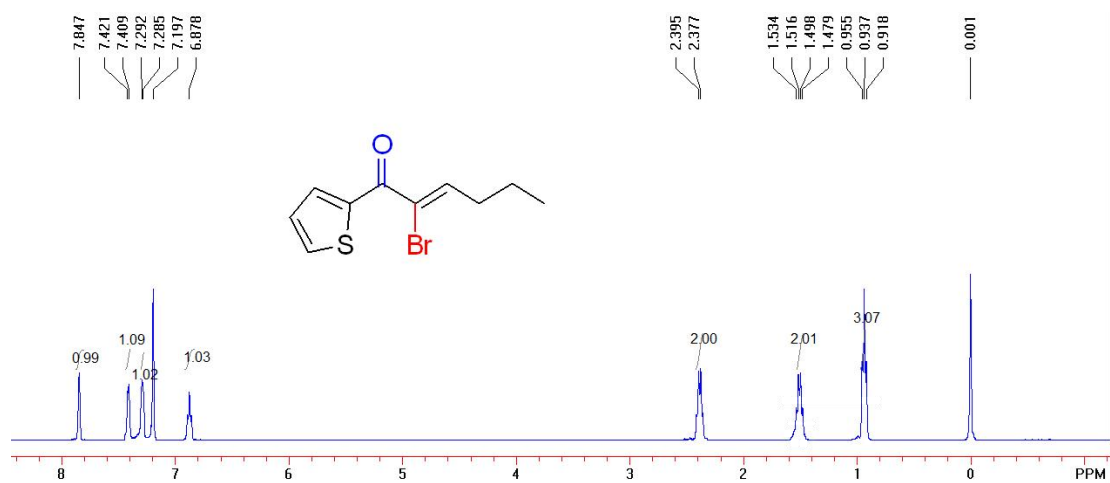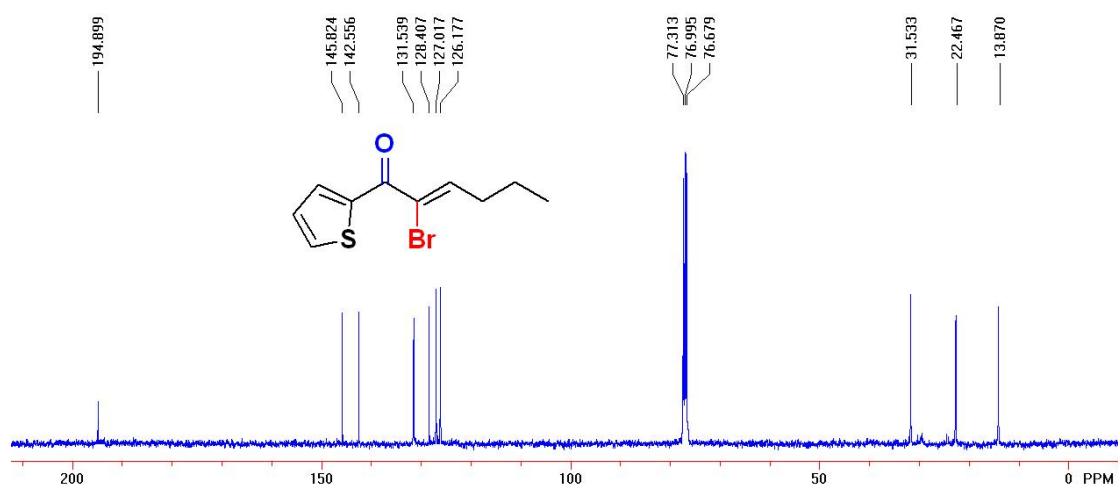

**(Z)-2-bromo-1-(dibenzo[b,d]furan-1-yl)hex-2-en-1-one (2q)**

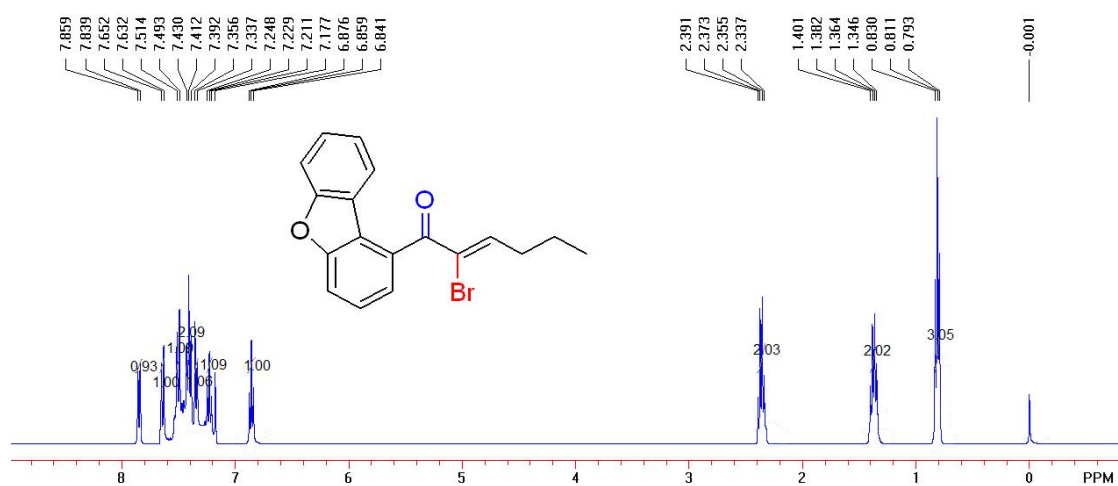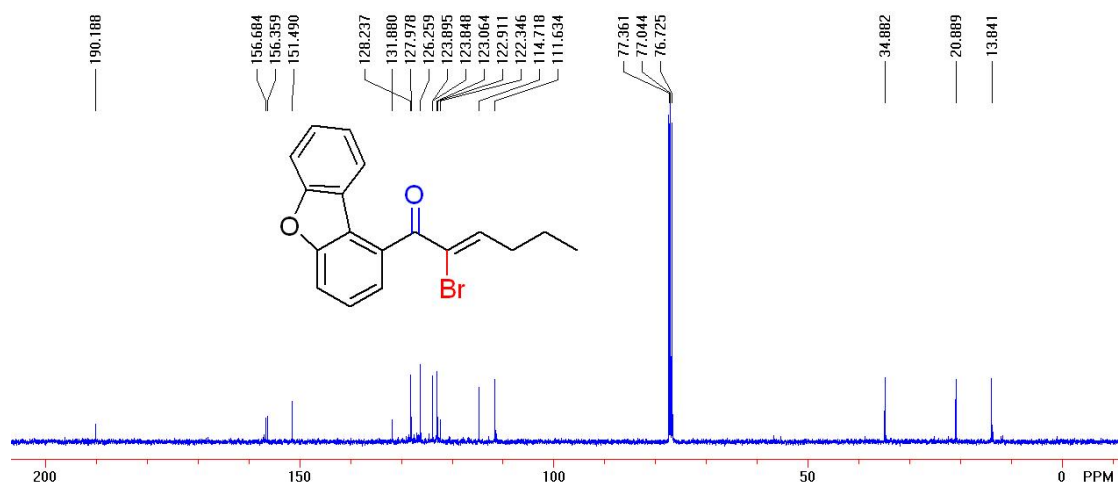

**(Z)-2-bromo-1-phenylbut-2-en-1-one (2r)**

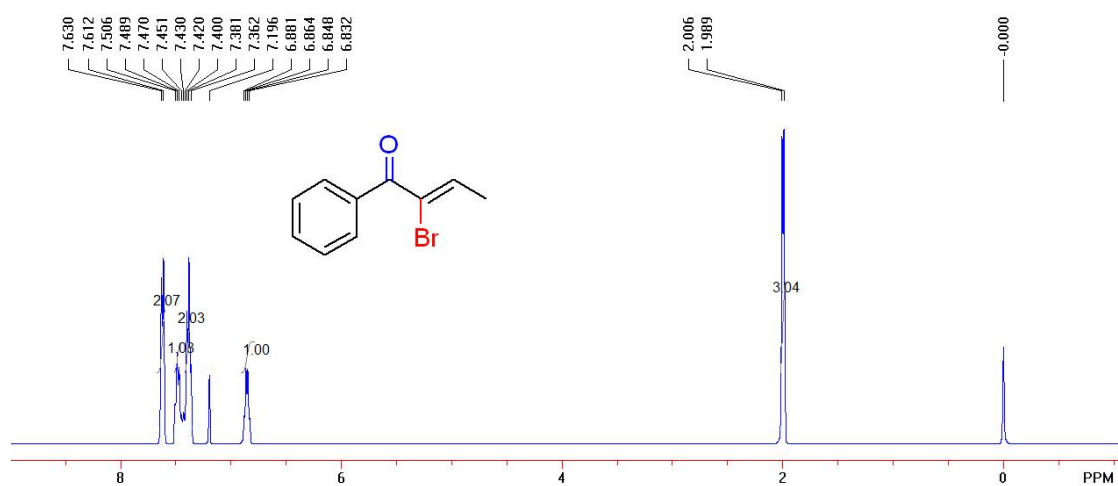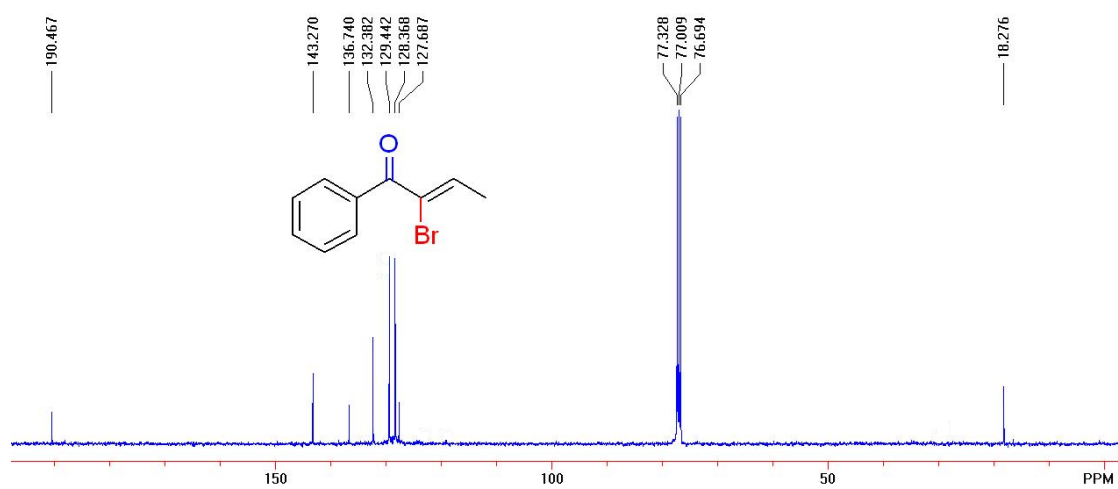

**(Z)-2-bromo-1-phenylpent-2-en-1-one (2s)**

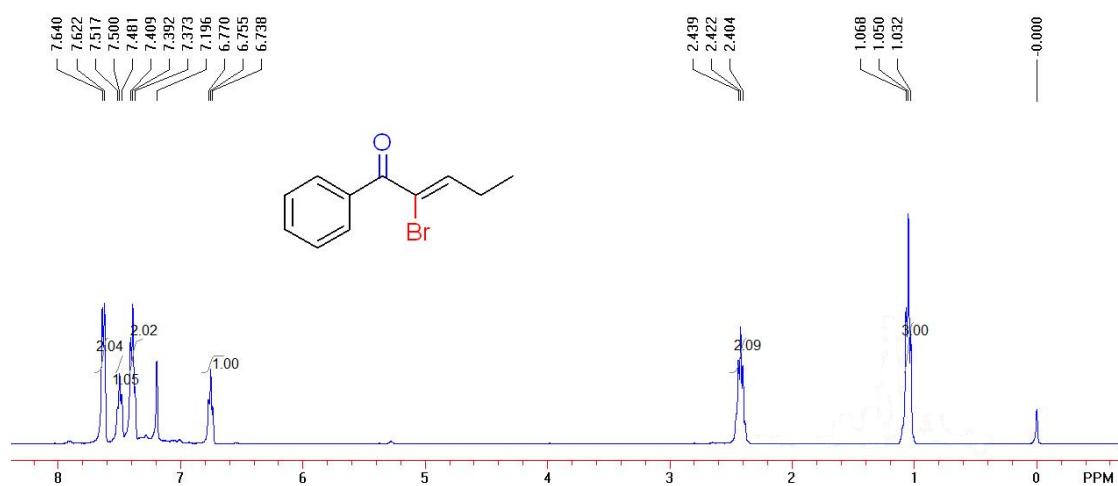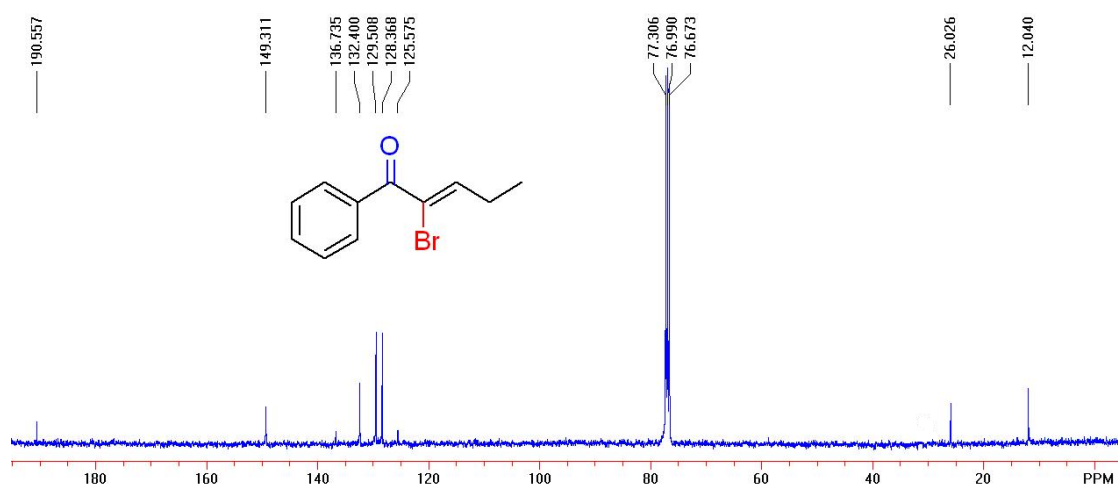

**(Z)-2-bromo-1-phenylhept-2-en-1-one (2t)**

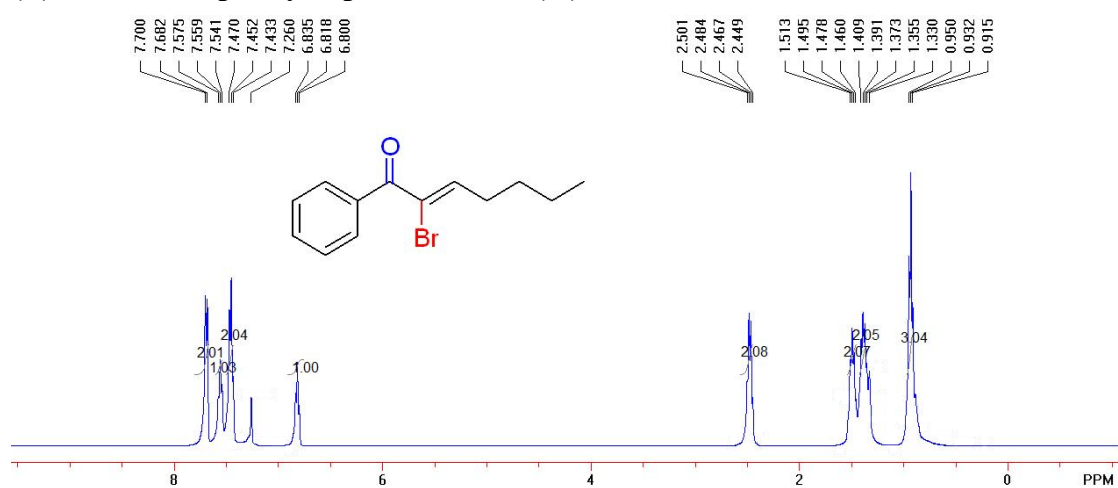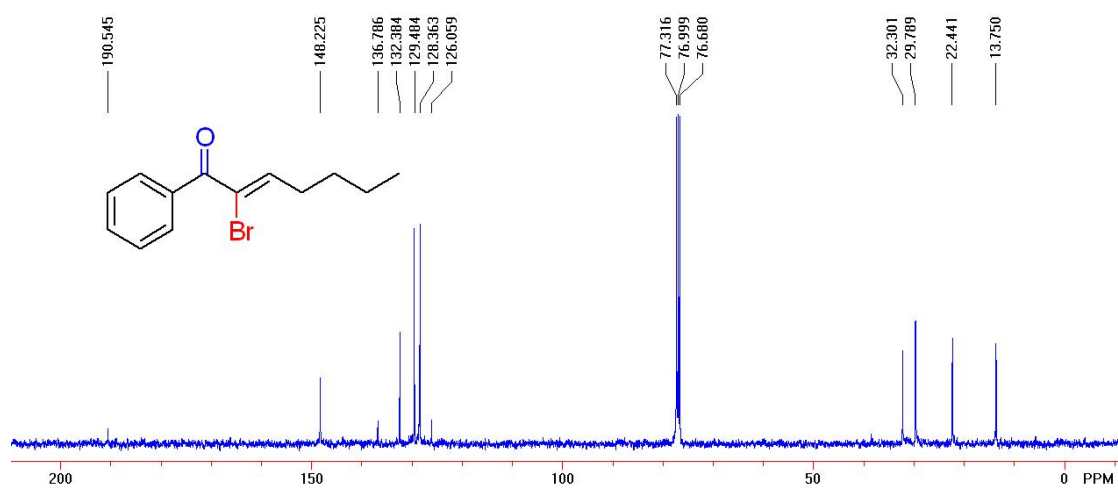

**(Z)-2-bromo-6-chloro-1-phenylhex-2-en-1-one (2u)**

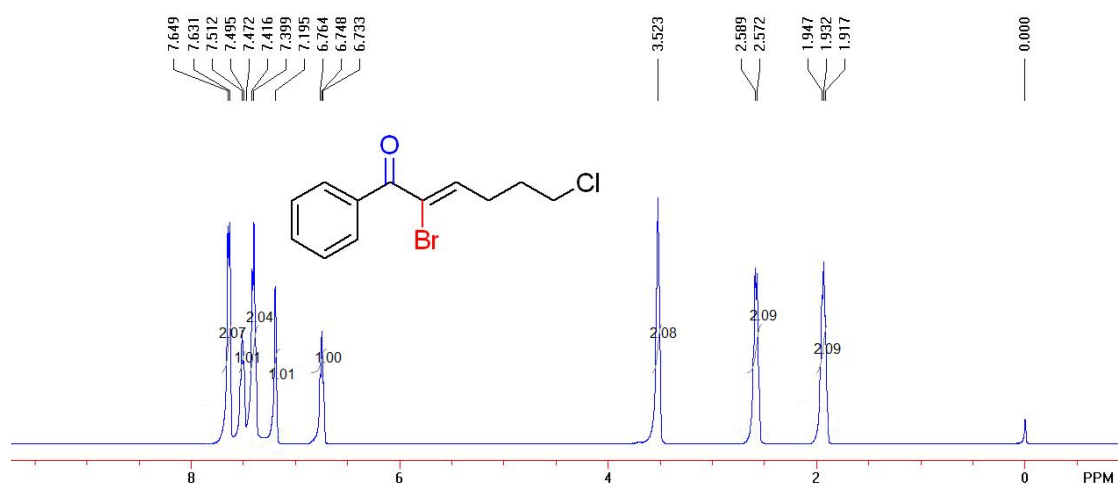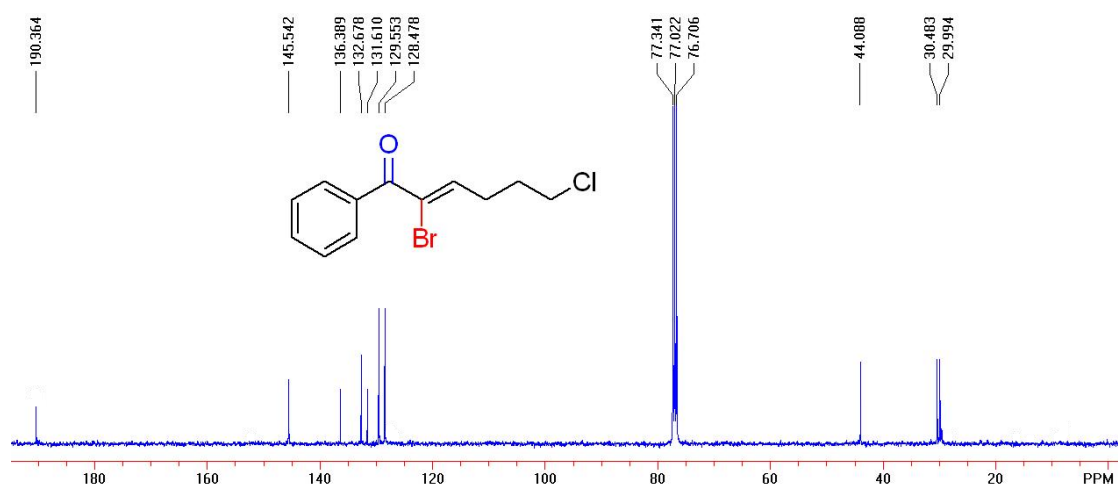

**(Z)-3-bromo-4-oxo-4-phenylbut-2-en-1-yl acetate (2v)**

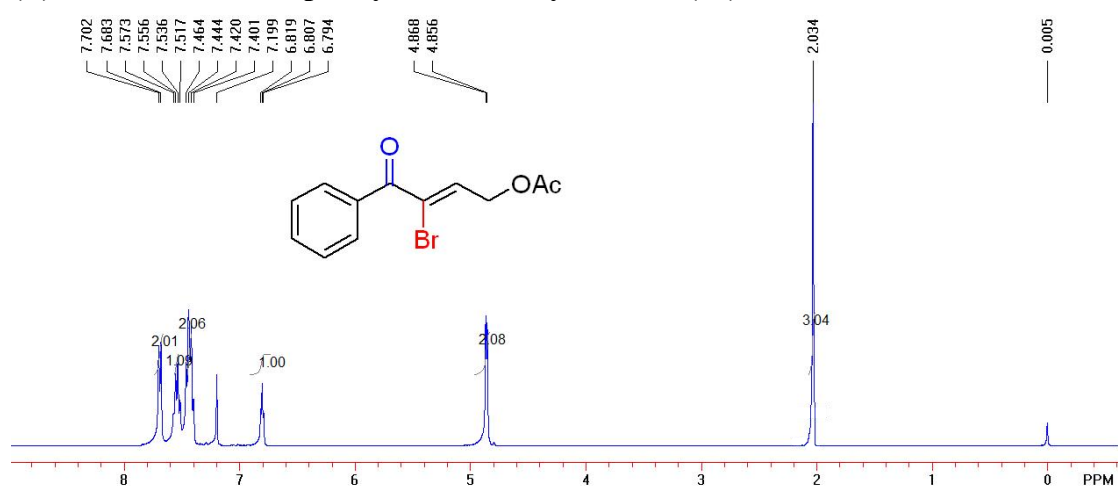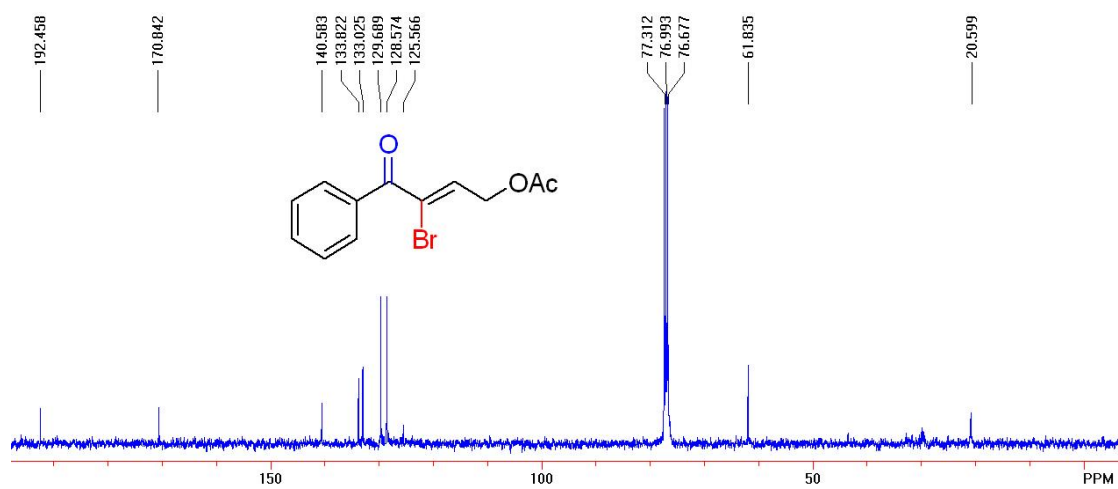

# 2-bromo-3-methyl-1-phenylbut-2-en-1-one (2w)

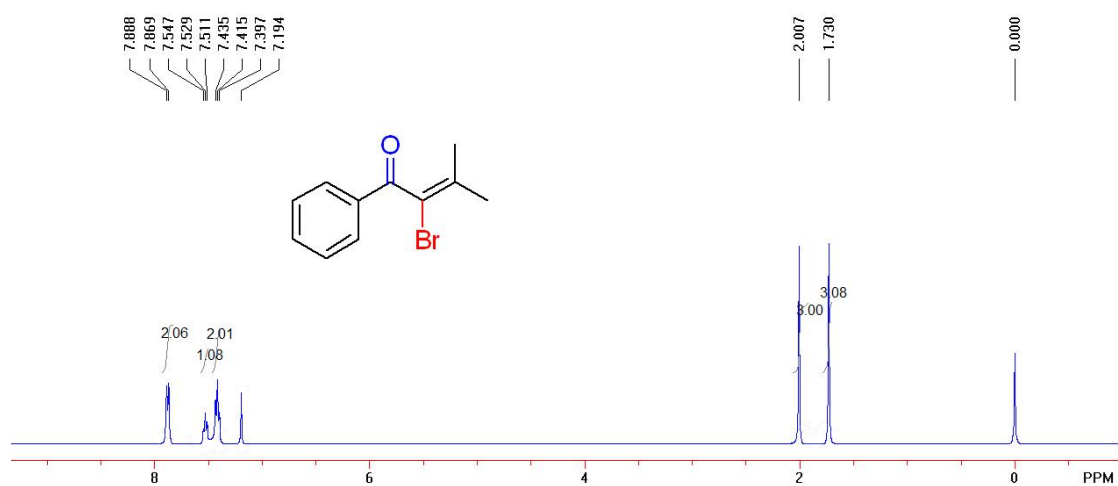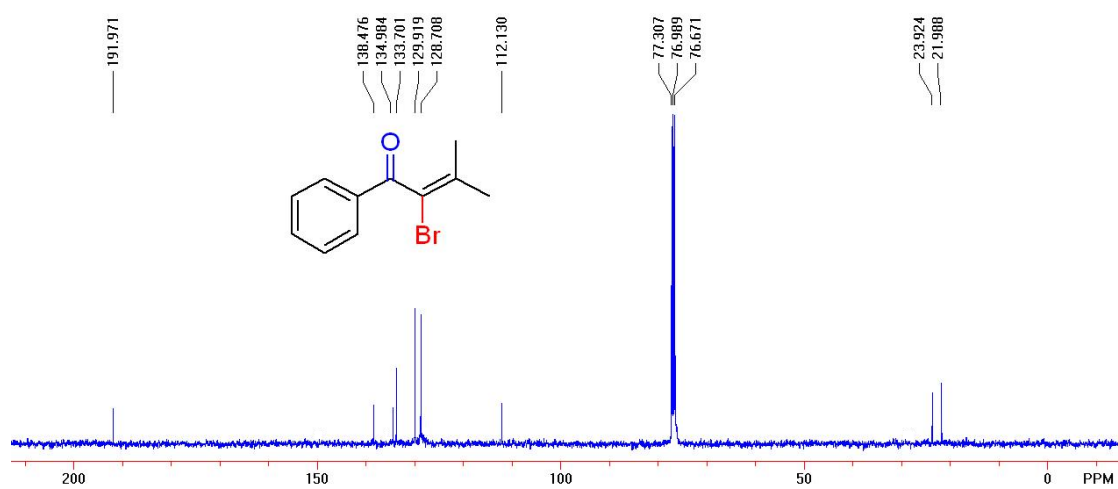

**(Z)-2-bromo-3,4-dimethyl-1-phenylpent-2-en-1-one (2x)**

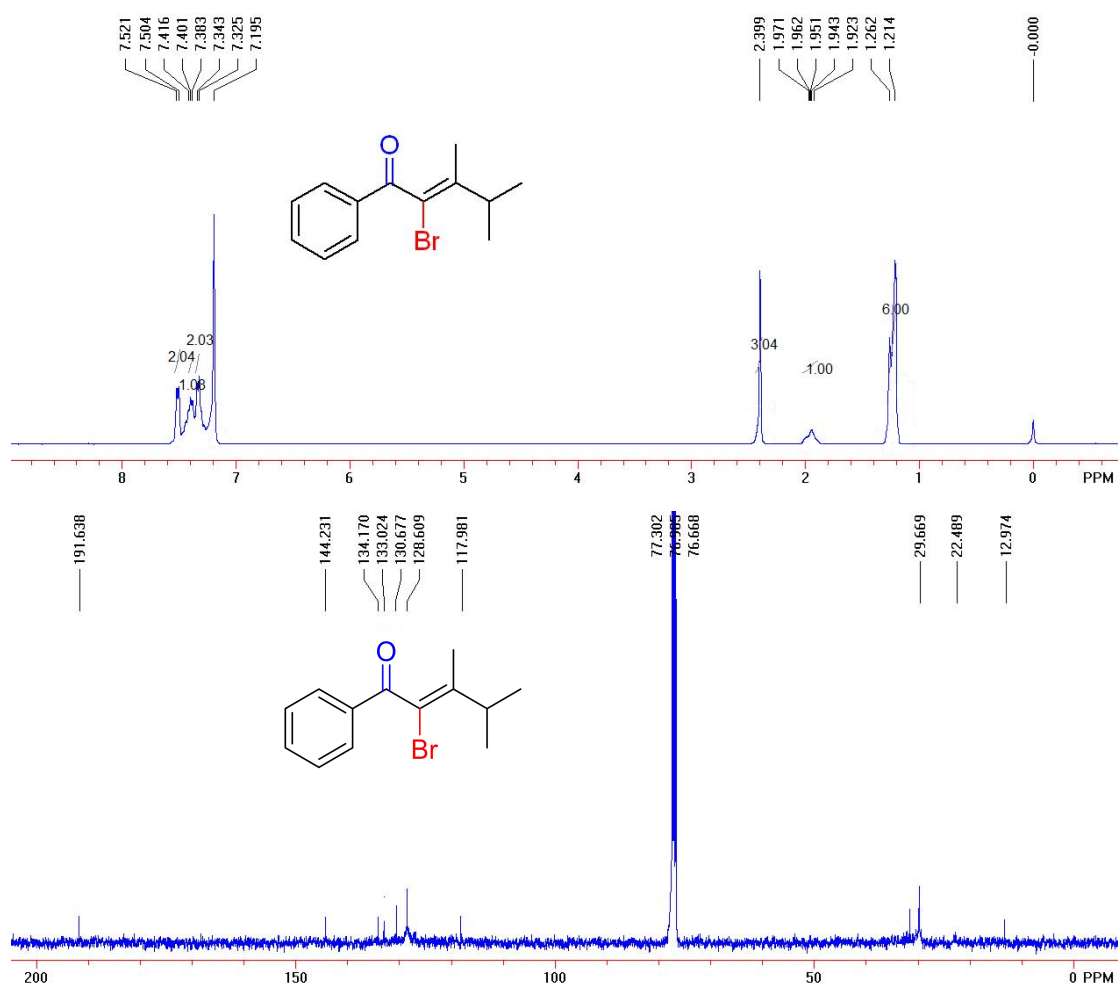

# 2-bromo-1-phenylprop-2-en-1-one (2y)

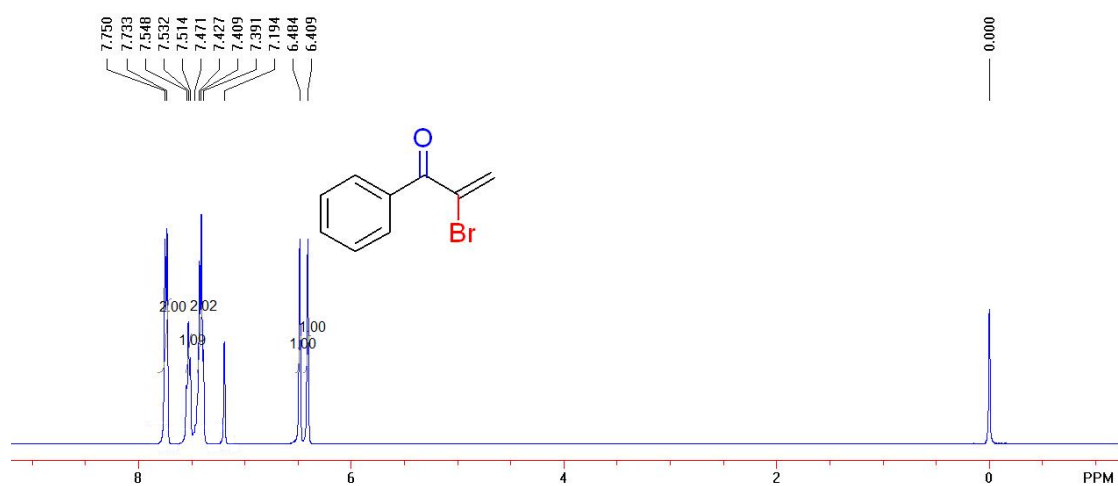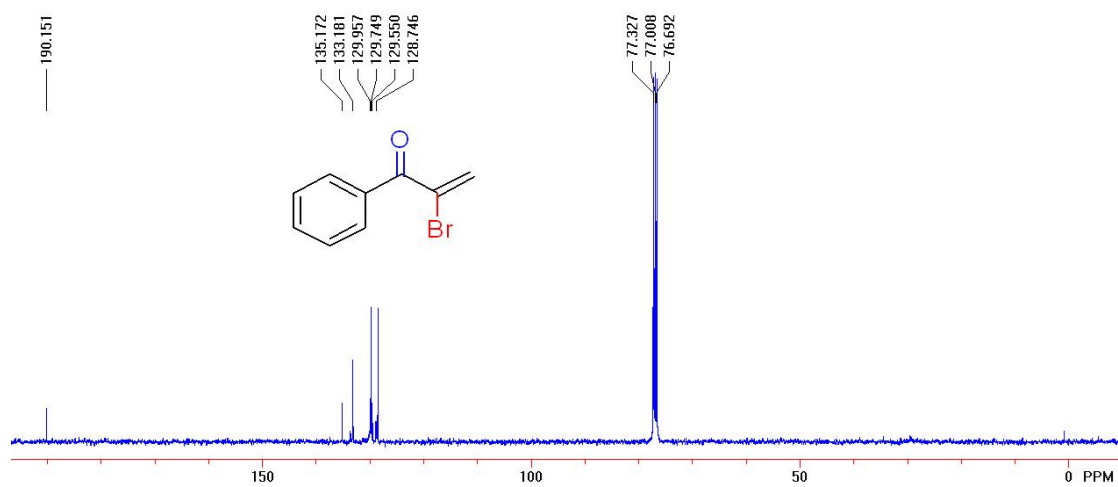

Supplement: d6gc02782b1.pdf [file d6gc02782b1.pdf]
